# Supplementary material
Source: PubMed Central journal article supplement (PMC10904330)
Supplement: NIHMS1966881-supplement-Supplementary_Note.pdf [file NIHMS1966881-supplement-Supplementary_Note.pdf]

1 **Supplementary Note for**  
2 ***Modeling tissue co-regulation estimates tissue-specific contributions to disease***

3  
4 **Supplementary Table Captions**

5  
6 **Supplementary Table 1. Numerical results for robustness and power of TCSC regression in simulations.** Across six different eQTL sample sizes, we evaluate the causal and null bias in estimates of disease heritability explained by the *cis*-genetic component of gene expression in tissue  $t'$  ( $h_{ge(t')}^2$ ), the type I error, and the power of TCSC. The standard errors (SE) are computed as the standard deviation of measurements across simulations divided by the square root of the number of simulations, e.g. 1,000. Type I error is measured as the percentage of estimates of  $h_{ge(t')}^2$  for non-causal tissues that were significantly positive for non-causal tissues at  $p < 0.05$  for nominal significance or at 5% FDR across tissues using a one-sided z-test. Power is measured as the percentage of estimates of  $h_{ge(t')}^2$  for causal tissues that were significantly positive at  $p < 0.05$  for nominal significance or at 5% FDR across tissues using a one-sided z-test.

16  
17 **Supplementary Table 2. Type I error and power of RTC Coloc, LDSC-SEG, RolyPoly, and CoCoNet in simulations.** We implemented all methods as previously described and applied it to our TCSC simulation framework, such that the same eQTL effect sizes and co-regulation was used. We performed 1,000 simulations of LDSC-SEG, RolyPoly, and CoCoNet and 100 simulations of RTC Coloc, due to the complexity and prohibitively large computation time of RTC Coloc.

23  
24 **Supplementary Table 3. Numerical results for robustness and power of cross-trait TCSC in simulations.** Across six different eQTL sample sizes, we evaluate the causal and null bias on the estimate of tissue-specific contributions to covariance, the type I error, and the power of cross-trait TCSC. The standard errors (SE) are computed as the standard deviation of measurements across simulations divided by the square root of the number of simulations, e.g. 1,000. Type I error is measured as the percentage of estimates of  $\omega_{ge(t')}$  for non-causal tissues that were significantly positive at  $p < 0.05$  for nominal significance or at 5% FDR across tissues using a one-sided z-test. Power is measured as the percentage of estimates of  $\omega_{ge(t')}$  for causal tissues that were significantly positive at  $p < 0.05$  for nominal significance or at 5% FDR across tissues using a one-sided z-test.

34  
35 **Supplementary Table 4. List of 78 diseases and complex traits analyzed in primary analyses.** We selected 78 diseases/traits, 33 of which are from UK Biobank, such that all summary statistics have SNP-heritability z-score  $> 6$  and no pair of traits have a squared genetic correlation greater than 0.1 as well as substantial sample overlap. We report the SNP-heritability, standard error, z-score, GWAS sample size, trait nickname used to index traits in plots and tables, and the name of the most closely related trait analyzed in previous studies<sup>1,2</sup>.

41  
42 **Supplementary Table 5. Numerical results for tissue-specific contributions to disease and complex trait heritability.** For each significant tissue-trait pair identified by TCSC as reported in

44 **Fig. 3**, we report the value of  $\pi_{t'}$ , or the proportion of SNP-heritability explained by tissue-  
45 specific predicted gene expression, and the false discovery rate for each finding. We also report  
46 the result of an independent analysis for traits for which we could easily obtain independent  
47 GWAS summary statistics.

48

49 **Supplementary Table 6. Numerical results for tissue-specific contributions to disease and**  
50 **complex trait heritability for all tissues and diseases/traits analyzed.** For every tissue-trait pair  
51 analyzed by TCSC, across 39 tissues and 78 diseases/traits, we report the phenotypic variance  
52 explained by tissue-specific predicted gene expression,  $h_{ge(t)}^2$ , the jackknife standard error of  
53 this quantity, the nominal  $P$  value from a one-sided z-test, the FDR calculated across tissues  
54 per-trait, the value of  $\pi_{t'}$ , and the standard error of  $\pi_{t'}$ . We estimated the standard error of  
55 this quantity using a genomic block jackknife. We note that no value of  $h_{ge(all\ tissues)}^2$  exceeds  
56 the SNP-heritability for a given trait. The largest value of  $h_{ge(all\ tissues)}^2$  is 0.68, which is for red  
57 blood cell distribution width.

58

59 **Supplementary Table 7. Median jackknife  $P$  values across traits for each tissue.** Here we  
60 report the median jackknife  $P$  value across traits for each tissue. For pairs of tissues with high  
61 genetic correlation, if the median jackknife  $P$  value is substantially different across traits, this  
62 means TCSC is systematically more likely to identify the tissue with lower median jackknife  $P$   
63 value as a causal tissue relative to the other, and this might suggest an issue in quality of gene  
64 expression prediction models from the tissue with larger median jackknife  $P$  value.

65

66 **Supplementary Table 8. Numerical results for tissue-specific contributions to disease and**  
67 **complex trait heritability in secondary analysis of 23 tissues, removing tissues with small**  
68 **eQTL sample size.** To increase the power of TCSC to identify causal tissues, we removed tissues  
69 with eQTL sample size less than 320. As a result, we analyzed 23 tissues across 78  
70 diseases/traits. We report the same quantities reported in **Supplementary Table 6**.

71

72 **Supplementary Table 9. Statistical significance of differences between TCSC estimates in**  
73 **primary and secondary analyses.** For every significant tissue-trait pair identified in the primary  
74 analysis (analysis of 39 tissues, **Fig. 4**), we assessed if the value of  $\pi_{t'}$  was significantly different  
75 than the value produced in the secondary analysis (analysis of 23 tissues, **Supplementary Table**  
76 **8**). We used a genomic block jackknife to assess the difference and using a two-sided test,  
77 identified that no differences were significantly nonzero at 10% FDR.

78

79 **Supplementary Table 10. List of 41 brain diseases/traits analyzed in brain-specific analysis.**  
80 We performed a brain-specific TCSC analysis to exploit the diversity of brain tissues provided by  
81 GTEx ( $n = 13$  brain tissues). We analyzed 41 brain diseases/traits using a similar trait selection  
82 procedure as was used to select the 78 diseases/traits previously analyzed. However, we first  
83 selected for diseases/traits that were behavioral or a known cognitive disorder and iteratively  
84 removed traits until no pair of traits had a squared genetic correlation greater than 0.25.

85

86 **Supplementary Table 11. List of 13 GTEx brain tissues analyzed in brain-specific analysis.** For  
87 the brain-specific TCSC analysis, we built gene expression prediction models using all European  
88 samples from each of 13 GTEx brain tissues, without subsampling or meta-analysis. Here we list  
89 the name and eQTL sample size of each GTEx brain tissue, e.g. tissue names beginning with  
90 “Brain\_”. For this analysis, we excluded several tissues relevant to the central nervous system,  
91 including pituitary ( $N = 220$ ) and tibial nerve ( $N > 320$ ).

92  
93 **Supplementary Table 12. Numerical results for tissue-specific contributions to disease and  
94 complex trait heritability in brain-specific analysis.** For every brain tissue and brain trait  
95 analyzed in the brain-specific TCSC analysis, we report  $\pi_{t'}$ , its standard error, and false  
96 discovery rate.

97  
98 **Supplementary Table 13. Numerical results for comparison of disease-critical tissues  
99 identified by RTC Coloc, LDSC-SEG and TCSC for 5 representative traits.** For every tissue-trait  
100 pair shown in Fig. 4, we report the FDR and  $-\log_{10}$ FDR of the association statistic for each  
101 method (enrichment statistic for Ongen 2017 RTC Coloc, tau\* S-LDSC statistic for Finucane 2018  
102 LDSC-SEG, and  $\pi_{t'}$  for TCSC). The seven traits are the ones having at least one significantly  
103 associated tissue across the three methods with the largest SNP-heritability z-score. The tissues  
104 reported here are the causal tissues for each of the five traits as well as the most genetically  
105 correlated tissue (using marginal eQTL effect sizes).

106  
107 **Supplementary Table 14. Numerical results for comparison of disease-critical tissues  
108 identified by RTC Coloc, LDSC-SEG and TCSC for all 21 diseases/traits with causal tissue-trait  
109 associations identified by TCSC.** We report the FDR and  $-\log_{10}$ FDR of the association statistic for  
110 each method across all traits shown in Fig. 3 and each tissue with an association statistic with  
111 FDR < 5%.

112  
113 **Supplementary Table 15. Numerical results for comparison of disease-critical tissues  
114 identified by RTC Coloc, LDSC-SEG and TCSC for all diseases/traits and tissues included in  
115 these comparisons.** We report the FDR and  $-\log_{10}$ FDR for every tissue-trait pair (39 tissues, 78  
116 traits) across each of three compared methods. A value of NA indicates that the tissue-trait pair  
117 was not analyzed by the corresponding method.

118  
119 **Supplementary Table 16. Numerical results for comparison of disease-critical tissues  
120 identified by RTC Coloc, LDSC-SEG and TCSC for brain-specific analysis.** We report the FDR and  
121  $-\log_{10}$ FDR for the brain-specific analysis for each of 41 brain traits, 13 brain tissues, and 3  
122 methods, restricting to tissues and traits with a TCSC finding at FDR < 10%, plotted in **Extended  
123 Data Fig. 8.** A value of NA indicates that the tissue-trait pair was not analyzed by the  
124 corresponding method.

125  
126 **Supplementary Table 17. List of 262 pairs of diseases/traits analyzed by cross-trait TCSC.** We  
127 computed the genetic correlation between all pairs of 78 diseases/traits and selected those  
128 pairs with genetic correlation two-sided z-test  $P$  value < 0.05/3,003 pairs of traits, e.g. using a

129 Bonferroni correction threshold. Here, we report the genetic correlation z-score of these pairs  
130 and the estimate of the covariance.

131

132 **Supplementary Table 18. Numerical results for tissue-specific contributions to the genetic**  
133 **covariance of two diseases/traits (Figure 6A).** For all tissue-trait covariance pairs identified by  
134 TCSC at 10% FDR, we report the value of  $\zeta_{t'}$ , or the proportion of covariance explained by  
135 predicted gene expression in tissue  $t'$  and the FDR.

136

137 **Supplementary Table 19. Numerical results for tissue-specific contributions to the genetic**  
138 **covariance of two diseases/traits for all tissues and disease/trait pairs analyzed.** For all tissue-  
139 trait covariance pairs analyzed by TCSC, we report the estimated tissue-specific covariance, its  
140 jackknife standard error, nominal  $P$  value from a two-sided z-test,  $\zeta_{t'}$  and corresponding  
141 standard error, FDR, and genome-wide covariance for the trait pair.

142

143 **Supplementary Table 20. List of tissue-trait covariance pairs and reported differences in**  
144 **tissue-specific contributions to genetic covariance vs. constituent trait heritability.** For every  
145 pair of traits implicated by **Figure 6** and for each of 38 tissues, we assess the difference  
146 between  $\zeta_{t'}$  and  $\pi_{t'}$  for each trait. We identified five tissue-trait covariance pairs for which the  
147 difference was significantly nonzero while the value of  $\pi_{t'}$  was not significantly different than  
148 zero at a significance threshold of 5% FDR across tissues per-trait.

149

150 **Supplementary Table 21. Scenarios where TCSC has more power in the cross-trait analysis**  
151 **than in the single-trait analysis.** We used primary simulations and performed new simulations  
152 in which tissue-specific contributions to covariance were greater than tissue-specific  
153 contributions to heritability in order to report the percentage of simulations in which the causal  
154 tissue was detected in the cross-trait analysis but not detected in both of the single-trait  
155 analyses.

156

157

158

159

160

161

162

163

164

165 **Supplementary Note**

166

167 ***Simulation Framework***

168

169 We employed a widely used TWAS simulation framework (Mancuso Lab TWAS  
170 Simulator, see **Code Availability**) to assess the power, bias, and calibration of TCSC in the  
171 presence of co-regulation across genes and tissues. We simulated a genome in which there are  
172 1,000 protein-coding genes from chromosome 1, of which 100 (10%) are causal<sup>3</sup>. For each  
173 tissue, 500 genes were chosen to be *cis*-heritable; in the causal tissue and the three most highly  
174 genetically correlated tagging tissues, all 100 causal genes were *cis*-heritable. Each primary  
175 simulation consists of 10 tissues, of which at least one is causal, defined as having nonzero  
176 gene- disease effect sizes. We create a covariance structure among tissues mimicking empirical  
177 GTEx data. We use a previously published method to estimate the causal cross-tissue  
178 correlation of eQTL effect sizes which is 0.75<sup>4</sup>. Briefly, this method extends cross-trait LD score  
179 regression and leverages *cis*-eQTL summary statistics across all expressed genes in a tissue to  
180 compute cross-tissue genetic correlations. We observe that not all GTEx tissues are equally  
181 correlated to one another. We estimate three different cross-tissue eQTL correlation quantities:  
182 (1) average correlation across all pairs of tissues = 0.75, (2) average correlation across similar  
183 tissues = 0.80, e.g. brain (13 in GTEx) or adipose (2 in GTEx) tissues, and (3) average correlation  
184 across dissimilar tissues, e.g. pairs of brain and adipose tissues = 0.74. To represent these  
185 biological modules, we let simulated tissues 1-3 have higher correlation of true eQTL effects to  
186 one another than to other tissues; likewise for tissues 4-6 and 7-10. We set covariance  
187 parameters, described below, such that the similar tissues had an average eQTL correlation of  
188 0.795 across genes, dissimilar tissues have an average eQTL correlation of 0.722, and the  
189 average eQTL correlation across any pair of tissues is 0.753. We use real genotypes from  
190 European individuals in the 1000 Genomes Project to define the pairwise SNP LD structure  
191 which is used to simulate genotypes, gene expression traits, and complex traits/diseases. We  
192 simulate each gene having 5 true *cis*-eQTLs, based on the upper bound of empirical data from  
193 GTEx<sup>5</sup> and others<sup>6</sup>, as well as the value used in other TWAS simulation methods<sup>7</sup>. Between pairs  
194 of co-regulated tissues, the same gene shares 3 *cis*-eQTLs. Between pairs of co-regulated genes  
195 in the same tissue, 3 *cis*-eQTLs are shared. The minimum allowed *cis*-heritability of a gene is  
196 0.01 in our simulations. *Cis*-heritability is approximated as the sum of squared true *cis*-eQTL  
197 effect sizes, as done previously<sup>8</sup>. The *cis*-heritability of each gene was sampled from an  
198 exponential distribution, and neighboring co-regulated genes were assigned the same  
199 heritability to maximize gene-gene co-regulation. In each tissue, the average *cis*-heritability  
200 (across genes) was set to 0.08 (sd = 0.05, ranging from 0.01 to 0.40) in order to achieve an  
201 average estimated *cis*-heritability (*across significantly cis-heritable genes, estimated by GCTA*<sup>9</sup>)  
202 varying from 0.11 to 0.31 (across gene expression sample sizes), which matches empirical  
203 values from GTEx<sup>5</sup>. Effect sizes for the 3 shared eQTLs across tissues are sampled from a  
204 multivariate normal distribution with mean 0 and a variance-covariance matrix. We define the  
205 variance and covariance terms of this matrix such that (1) the proportion of genes detected as  
206 significantly *cis*-heritable by GCTA at a given sample size and (2) the average *cis* heritability of  
207 detected genes at a given sample size match empirical observations from GTEx data at sample  
208 sizes N = 100, 200, 300 and 500. As a result, the diagonal of the variance-covariance matrix, e.g.

209 the variance term, is set to 0.075, and the off-diagonal elements are set to the product of the  
210 variance term and the desired correlation for each tissue pair, described above.

211 For each of 1,000 independent simulations per analysis, we simulate a GWAS ( $N =$   
212 10,000) by creating a complex trait which is the summation of the genetic components of  
213 causal gene expression (in the causal tissue). We use simulated genotypes based on the LD  
214 structure of 1000 Genomes. Gene-disease effect sizes are drawn from a normal distribution  
215 with mean 0 and variance 1. In cross-trait TCSC analysis, effect sizes across genes between the  
216 two traits are correlated with default  $R_g = 0.5$ . To simulate a GWAS trait, we first compute the  
217 genetic component of each gene, which is the product of GWAS cohort genotypes and eQTL  
218 effects, such that we have 100 gene-specific traits. We then add noise to each gene-specific  
219 trait such that the total variance of the phenotype explained by the five eQTLs from the causal  
220 tissue is equal to a specified value; the value of  $h_{ge(t)}^2$  in primary simulations is 10%. Then, we  
221 multiply each gene-specific trait by the causal gene-disease effect size, consistent with the  
222 additive generative model of gene-level effects on trait (see above). Finally, we take the sum  
223 across all gene-specific traits to make one complex trait, where the total variance of the trait  
224 explained by gene effects from the causal tissue is  $h_{ge(t)}^2$ , e.g. 10%.

225 We simulate an eQTL cohort of various gene expression sample sizes ( $N = 100, 200, 300,$   
226 500, 1000, 1500) using simulated genotypes based on the LD structure of 1000 Genomes. We  
227 simulate total gene expression in the eQTL cohort by adding a desired amount of noise to the  
228 genetic component of gene expression, e.g. the product of individual genotypes and true eQTL  
229 effect sizes, with variance equal to one minus the gene expression heritability, which is the sum  
230 of squared eQTL effects. Next, we fit gene expression prediction models by regressing the total  
231 gene expression on eQTL cohort genotypes of *cis* variants using lasso regularization, a standard  
232 approach used in TWAS. We define significantly *cis*-heritable genes as genes with GCTA  
233 heritability  $P$  value  $< 0.01^{10}$  and heritability estimate  $> 0$ , and adjusted- $R^2 > 0$  in cross-validation  
234 prediction.

235 Then we estimate co-regulation scores at each different eQTL sample size by predicting  
236 gene expression into a cohort of 500 individuals, to approximate the size of the European  
237 sample of 1000 Genomes ( $N = 489$ ). Using significantly *cis*-heritable genes from each tissue at a  
238 given sample size, we estimate gene and tissue co-regulation scores  $l(g, t; t')$  as described  
239 above, including bias correction. In simulations, *cis* genes are defined as genes within the same  
240 1 Mb block.

241 Then we apply TWAS to individual-level simulated GWAS data and gene expression  
242 prediction models. We predict gene expression into each of the 10,000 GWAS cohort individuals  
243 across all significantly *cis*-heritable genes for each tissue. We regress each complex trait on  
244 predicted gene expression to obtain TWAS z-scores. Finally, we run TCSC by regressing TWAS  $\chi^2$   
245 statistics, or products of TWAS z-scores, on bias-corrected gene and tissue co-regulation scores.  
246

247 We simulated four tissue-trait association methods: RTC Coloc<sup>1</sup>, LDSC-SEG<sup>2</sup>, RolyPoly<sup>11</sup>,  
248 or CoCoNet<sup>12</sup>. First, we simulated the RTC Coloc method<sup>1</sup> by leveraging our existing TCSC  
249 simulation framework such that both methods could be compared via application to same  
250 simulated data (**Code Availability**, ref.<sup>13</sup>). We used the same simulated GWAS cohort of 10,000  
251 individuals as in our TCSC simulations and then followed the steps of the RTC Coloc method as

252 published. Briefly, we perform a genome-wide association study using our simulated complex  
253 trait and the genotypes of our simulated GWAS cohort and select null variants with similar LD  
254 properties. Then, we simulate an eQTL cohort consisting of total gene expression and  
255 genotypes, using the same underlying true eQTL effect sizes as for TCSC simulations. Then, we  
256 perform colocalization analysis of GWAS variants with eQTLs, across 10 tissues at 6 different  
257 eQTL sample sizes, to obtain the regulatory trait concordance (RTC) score. This is repeated for  
258 the set of null variants. Next, we perform colocalization analysis of eQTL variants between pairs  
259 of tissues to obtain tissue-sharing RTC scores, and similarly repeat this for null variants. GWAS-  
260 eQTL RTC scores are divided by tissue-sharing RTC scores summed across variants. Tissue-  
261 specific enrichment is computed as the ratio of this quotient to the null quotient. The  
262 enrichment  $P$  value is obtained using a Wilcox test comparing the values of the quotient to the  
263 values of the null quotient.

264 Second, we simulated the three methods that utilize GWAS data and total expression  
265 across tissues: LDSC-SEG<sup>2</sup> (using S-LDSC v1.0.0), RolyPoly<sup>11</sup> (v0.1.0), and CoCoNet<sup>12</sup> (v1.0). To  
266 this end, we retained the full GWAS summary statistics from the RTC Coloc analysis above. We  
267 separately simulated total expression across tissues in which the 100 causal genes in addition to  
268 200 randomly selected genes were positively differentially expressed in the causal tissue and  
269 the two tagging tissues in the same simulated “module” as the causal tissue, e.g. with higher  
270 genetic correlation of gene regulatory effects. We also selected 100 random non-causal genes  
271 to be negatively differentially expressed in the causal tissue and the other two module tissues.  
272 For the remaining 7 tagging tissues, we randomly selected 300 genes to be positively  
273 differentially expressed, some of which at random will be causal genes, and let the remaining  
274 700 genes be negatively differentially expressed. Then, as previously done<sup>2</sup>, we calculated the  $t$ -  
275 statistics for the specific expression of each gene in each tissue. While we have modules of  
276 tissues that are more highly correlated to one another, these within-module tissues were  
277 excluded from the calculation of  $t$ -statistics, as previously done<sup>2</sup>. Finally, we created SNP-based  
278 annotations for each tissue, across 1000 simulations, and across 6 sample sizes, in which SNPs  
279 within +/- 100 kb of a specifically expressed gene is assigned a value of 1 and 0 otherwise, as  
280 previously done<sup>2</sup>. Then, we calculated LD scores and partitioned the heritability of our  
281 simulated complex traits. For the simulations of RolyPoly and CoCoNet, we installed the  
282 following R packages: rolypoly (v0.1.0) and CoCoNet (v1.0) and used the simulated data above  
283 to run each method. While CoCoNet does not technically use GWAS summary statistics, but  
284 rather gene-based “outcome variables”, we used the label of causal or non-causal for each gene  
285 in each tissue of our simulations as the outcome variable.

286  
287

### 288 ***Single-trait simulation analysis at large sample size***

289

290 We simulated four larger gene expression sample sizes: 10K, 50K, 100K, and infinite sample size  
291 (for infinite sample size, we used the true eQTL effect sizes in place of estimated effect sizes  
292 from the gene expression prediction model). Due to the computational intractability of running  
293 GCTA at these sample sizes across thousands of simulations, we used cross-validation adjusted-  
294  $R^2 > 0$  in lieu of GCTA to define significantly *cis*-heritable genes in analyses at very large sample  
295 sizes. We determined that the type I error of TCSC plateaus at 1,500 individuals (**Fig. 2C**); we

296 also confirmed that the alternative definition of *cis*-heritable genes did not impact results at  
297 intermediate sample sizes (**Fig. 2C** vs. **Fig. 2B**).

298

### 299 ***Cross-trait simulation analyses***

300

301 We first evaluated the bias in TCSC estimates of the genetic covariance explained by the *cis*-  
302 genetic component of gene expression in tissue  $t'$  ( $\omega_{ge(t')}$ ), for both causal and non-causal  
303 tissues (**Extended Data Fig. 2A, Supplementary Table 3**). For causal tissues, TCSC produced  
304 unbiased estimates of  $\omega_{ge(t')}$  (conservative estimates when setting  $G_{t'}$  to the number of  
305 significantly *cis*-heritable genes, rather than the number of true *cis*-heritable genes), analogous  
306 to single-trait simulations. For non-causal tissues, TCSC again produced estimates of  $\omega_{ge(t')}$  that  
307 were significantly positive when averaged across all simulations, but not large enough to  
308 substantially impact type I error. We next evaluated the type I error of cross-trait TCSC for non-  
309 causal tissues. TCSC was well-calibrated with type I error ranging from 5.4%-6.7% at  $p < 0.05$   
310 (**Extended Data Fig. 2B**). Finally, we evaluated the power of cross-trait TCSC for causal tissues.  
311 We determined that cross-trait TCSC was modestly powered at realistic eQTL sample sizes, with  
312 power ranging from 8%-27% across eQTL sample sizes at  $p < 0.05$  (**Extended Data Fig. 2C**) (and  
313 1-6% power at  $p < 0.004$  corresponding to 5% per-trait FDR across tissues in these simulations;  
314 **Supplementary Table 3**); as noted above, the power of TCSC varies greatly with the choice of  
315 parameter settings (see below). In ROC curve analysis, TCSC attained an AUC of 0.67 (**Extended**  
316 **Data Fig. 1**).

317

### 318 ***Secondary simulation analyses***

319

320 We performed twelve secondary analyses. First, we varied the eQTL sample size across tissues.  
321 Specifically, we set the eQTL sample size of the causal tissue to 300 individuals and the eQTL  
322 sample sizes of the non-causal tissues to range between 100 and 1,500 individuals. We  
323 observed inflated type I error for non-causal tissues (particularly those with larger eQTL sample  
324 sizes), implying that large variations in eQTL sample sizes may compromise type I error  
325 (**Supplementary Fig. 1**).

326 Second, we evaluated the robustness of TCSC when varying the number of expressed  
327 genes in the causal tissue under four scenarios: (i) only the 500 *cis*-heritable genes are  
328 expressed in the causal tissue, (ii) only 375 *cis*-heritable genes (including all 100 causal genes)  
329 are expressed in the causal tissue, (iii) only 225 *cis*-heritable genes (including all 100 causal  
330 genes) are expressed in the causal tissue, and (iv) only the 100 causal genes are expressed in  
331 the causal tissue. We determined that type I error remained approximately well-calibrated in all  
332 scenarios, and that power was dramatically improved and bias for non-causal tissues decreased  
333 as the number of tagging genes in the causal tissue decreased (**Supplementary Fig. 2-3**); for  
334 causal tissues, estimates of  $h_{ge(t')}^2$  were upward biased when setting  $G_{t'}$  to the number of true  
335 *cis*-heritable genes and unbiased when setting  $G_{t'}$  to the number of significantly *cis*-heritable  
336 genes across tissues.

337 Third, we varied the true values of  $h_{ge(t')}^2$  (or  $\omega_{ge(t')}$ ) for causal tissues. We determined  
338 that patterns of bias, type I error, and power were generally robust across different parameter



339 values, although the smallest values resulted in lower power and greater bias for non-causal  
340 tissues (**Extended Data Figs. 3-4**). Specifically, in **Extended Data Fig. 3**, we varied the value of  
341  $h_{ge(tr)}^2$  for causal tissues across different eQTL sample sizes. In panel A, we observe that at type  
342 I error is more consistent across different values of  $h_{ge(tr)}^2$  at smaller eQTL sample sizes. At  
343 larger eQTL sample sizes, smaller values of  $h_{ge(tr)}^2$  have the lowest error rates, with the smallest  
344 value not significantly different than 5%. In panel B, we observe that small values of  $h_{ge(tr)}^2$   
345 result in low power, medium values of  $h_{ge(tr)}^2$  result in the greatest observed power, and  
346 (potentially unrealistically) large values of  $h_{ge(tr)}^2$  result in mediocre power. In panel C,  
347 estimates of  $h_{ge(tr)}^2$  are unbiased across sample sizes and different true values of  $h_{ge(tr)}^2$ . In  
348 panel D, there is greater null bias for small eQTL sample sizes and larger values of  $h_{ge(tr)}^2$  in the  
349 causal tissue. These patterns are similar when varying the value of  $\omega_{ge(tr)}$  in **Extended Data Fig.**  
350 **4**.

351 Fourth, we varied the number of causal tissues, considering 1, 2, or 3 causal tissues. We  
352 observed that the power of TCSC decreased with multiple causal tissues but did not differ  
353 greatly between 2 and 3 causal tissues (**Supplementary Figs. 4-5**); for causal tissues, estimates  
354 of  $h_{ge(tr)}^2$  were upward biased when setting  $G_{tr}$  to the number of true *cis*-heritable genes.  
355 Specifically, in **Supplementary Fig. 4**, we varied the number of causal tissues in the TCSC model.  
356 In panel A, the type I error tends to decrease with an increasing number of causal tissues. In  
357 panel B, the power to detect two or three causal tissues was significantly less than the power to  
358 detect a single causal tissue. In panel C, estimates of  $h_{ge(tr)}^2$  for causal tissues have anti-  
359 conservative bias for two or more tissues. In panel D, null bias decreases when there are  
360 multiple causal tissues. We observe similar patterns in **Supplementary Fig. 5** when varying the  
361 number of causal tissues in cross-trait TCSC simulations.

362 Fifth, we varied the number of non-causal tissues from 0 to 9. For causal tissues, TCSC  
363 estimates were upward biased with fewer tagging tissues but unbiased with more tagging  
364 tissues (**Extended Data Figs. 5-6**). TCSC type I error and power were generally higher with fewer  
365 tagging tissues; this finding does not compromise our real trait analysis, which involve a large  
366 number of tissues. Specifically, in **Extended Data Fig. 5**, we varied the number of non-causal  
367 tissues in the TCSC regression. In panel A, type I error decreased when increasing the number of  
368 non-causal tissues. In panel B, power was greatest for one or two tagging tissues, but decreased  
369 with every additional tagging tissue. In panel C, the estimate of  $h_{ge(tr)}^2$  for causal tissues had  
370 anti-conservative bias when there were fewer than 9 tagging tissues and unbiased when there  
371 were 9 tagging tissues. In panel D, null bias of  $h_{ge(tr)}^2$  for non-causal tissues is not significantly  
372 different than zero where there is only one tagging tissue; the most extreme case of anti-  
373 conservative null bias occurs at middle numbers of tagging tissues. We observed similar  
374 patterns for cross-trait TCSC in **Extended Data Fig. 6**.

375 Sixth, we modified TCSC to not correct for bias in tissue co-regulation scores arising  
376 from differences between *cis*-genetic and *cis*-predicted expression. We determined that  
377 removal of bias correction resulted in conservative bias in estimates for causal tissues,  
378 increased type I error, and similar power (**Supplementary Figs. 6-7**).

379 Seventh, we modified TCSC to apply bias correction to the calculation of all correlations  
380 of *cis*-predicted expression contributing to co-regulation scores rather than only those involving

381 the same gene and tissue, which resulted in a decrease in power, anti-conservative bias in  
382 estimates for causal tissues, and similar type I error rate (**Supplementary Figs. 8-9**).

383 Eighth, we modified TCSC to use bias-corrected co-regulation scores in the calculation of  
384 regression weights, which resulted in similar performance to the default setting  
385 (**Supplementary Figs. 10-11**). We note that regression weights pertain to maximizing signal to  
386 noise and not avoiding bias in estimates of  $h_{ge(t)}^2$ ; we continue to not perform bias correction  
387 when calculating regression weights, consistent with GCSC<sup>8</sup>.

388 Ninth, we violated the model assumption that gene-disease effects are independent and  
389 identically distributed (i.i.d.) across tissues by including a second causal tissue whose gene-  
390 disease effects correlate with varying degree to the gene-disease effects of the original causal  
391 tissue (**Supplementary Figs. 12-13**). We determined that while this increases noise to TCSC  
392 estimates, the estimates are generally unbiased and TCSC is able to powerfully identify the  
393 causal tissue, similar to the addition of a causal tissue where there are no shared gene-disease  
394 effects (see **Supplementary Figs. 4-5**).

395 Tenth, we violated the i.i.d. model assumption by duplicating the causal tissue. We  
396 determined that TCSC performs well, (e.g. frequently identifies both tissues as causal and  
397 estimates  $h_{ge(tr)}^2$  for both tissues without bias) despite the violation of model assumption  
398 (**Supplementary Fig. 14-15**), similar to the previous analysis.

399 Eleventh, we evaluated the robustness of TCSC in the presence of disease heritability  
400 that is not mediated via gene expression. We observed that all areas of TCSC performance are  
401 affected, with slightly increased type I error rates, decreased power in the case of larger non-  
402 mediated heritability, and upward bias in estimates of  $h_{ge(tr)}^2$  for causal tissues (**Supplementary**  
403 **Fig. 16-17**). However, in simulations incorporating the four larger gene expression sample sizes  
404 (see above), we determined that the type I error of TCSC at a given level of non-mediated  
405 disease heritability does not increase with larger gene expression sample size (**Supplementary**  
406 **Fig. 18-19**).

407 Finally, we evaluated the robustness of TCSC to variation in the window size used to  
408 identify co-regulated genes in the calculation of co-regulation scores and determined that TCSC  
409 performance was robust and type I error decreased with larger window sizes (**Supplementary**  
410 **Fig. 20-21**).

## 411 **Analyzing GTEx tissues**

412 We downloaded GTEx v8 gene expression data for 49 tissues. We excluded tissues with  
413 fewer than 100 samples, e.g. kidney cortex (n = 69). We retained only European samples for  
414 each tissue, as labeled by GTEx via PCA of genotypes. We constructed gene expression models  
415 for two scenarios: (1) subsampling to 320 individuals including meta-analyzed tissues (**Table 1**)  
416 or (2) using all European samples per tissue. We recommend meta-analyzing gene expression  
417 prediction models across tissues in the case of tissues with low eQTL sample size (e.g. < 320  
418 samples) and high pairwise genetic correlation (e.g. > 0.93). We determined in simulations that  
419 TCSC is sensitive to eQTL sample size differences, such that a tagging tissue with larger sample  
420 size than a causal tissue can produce false positive results; the subsampling approach was  
421 designed to mitigate this issue. For the subsampling procedure, we first set aside tissues with  
422  
423

424 more than 320 samples; we chose 320 based on the average GTEx tissue sample size ( $N = 271$ )  
425 and robustness of TCSC in simulations at  $N = 300$ . Then, we grouped tissues with genetic  
426 correlation, e.g. marginal effect size correlation as reported by GTEx, with  $R_g > 0.93$ , an arbitrary  
427 threshold that produced biologically plausible groups of related tissues, separating groups of  
428 brain tissues based on cranial compartment. We meta-analyzed gene expression prediction  
429 models for these grouped tissues in order to achieve a total sample size of 320 individuals  
430 where each tissue contributed an approximately equal number of samples, using an inverse-  
431 variance weighted meta-analysis across genes that were significantly *cis*-heritable in two or  
432 more constituent tissues. The prediction weights of genes that were significantly *cis*-heritable in  
433 a single constituent tissue were left unmodified.

434

### 435 ***Extended primary analysis of tissue-specific contributions to diseases and complex traits.***

436

437 WHRadjBMI (waist-hip-ratio conditional on body mass index) and subcutaneous adipose tissue  
438 ( $\pi_{t'} = 0.10$ , s.e. = 0.037,  $P = 2.4 \times 10^{-3}$ ). A previous study comparing subcutaneous adipose  
439 tissue to visceral adipose tissue found that the level of adiponectin, a hormone released by  
440 adipose tissue to regulate insulin, is specifically associated with subcutaneous adipose tissue  
441 and not visceral adipose tissue; and, adiponectin levels are significantly negatively correlated  
442 with waist-hip-ratio<sup>14</sup>. Furthermore, LDSC-SEG found WHRadjBMI to be associated not only  
443 with subcutaneous adipose, but also with visceral adipose tissue. While RTC Coloc finds many  
444 WHR-associated tissues, it was able to distinguish subcutaneous adipose ( $FDR = 2.9 \times 10^{-4}$ )  
445 from visceral adipose ( $FDR = 1$ ).

446

447 HDL (high density lipoprotein) with subcutaneous adipose tissue ( $\pi_{t'} = 0.159$ , s.e. = 0.054,  $P =$   
448  $1.5 \times 10^{-3}$ ) and whole blood ( $\pi_{t'} = 0.098$ , s.e. = 0.034,  $P = 1.8 \times 10^{-3}$ ). Previous work has  
449 implicated subcutaneous adipose tissue in mediating HDL levels, as this tissue stores cholesterol  
450 and expresses genes involved in cholesterol transport and HDL lipidation<sup>15</sup>. The relationship  
451 with whole blood is likely due to the role that red blood cells play in cholesterol transport, while  
452 being a large proportion of cells in whole blood samples<sup>16</sup>. Notably, TCSC did not identify liver  
453 as a causal tissue for HDL, and this might be due to the smaller eQTL sample size of liver which  
454 limits the power to detect this association.

455

456 BMI (body mass index) and brain cerebellum ( $\pi_{t'} = 0.042$ , s.e. = 0.015,  $P = 2.6 \times 10^{-3}$ ). While  
457 several studies have found that the central nervous system is enriched for genetic variation  
458 associated with BMI and obesity<sup>17,2,18</sup>, the precise causal brain tissue is uncertain. Neither LDSC-  
459 SEG nor RTC Coloc can distinguish between highly co-regulated brain tissues, such as the  
460 cerebellum and cortex. Previous studies have indicated that the brain cerebellum takes part in  
461 regulating feeding control (for example via connection to the hypothalamus) and therefore can  
462 have substantial impacts on obesity related traits and diseases<sup>19</sup>. Moreover, differential activity  
463 has been observed in the brain cerebellum in individuals experiencing hunger, thirst, or  
464 satiation<sup>19</sup>. Furthermore, a different study associated the brain cerebellum with endocrine  
465 homeostasis, suggesting that the cerebellum plays several important biological roles, rather  
466 than strictly motor control<sup>20</sup>. A more recent multi-omics approach identified that cerebellar

467 nuclei in mice are activated when they are eating and even suggests a potential therapeutic  
468 target for the management of excessive eating behavioral traits<sup>21</sup>.

469

470 Fecundity and brain cerebellum ( $\pi_{t'} = 0.075$ , s.e. = 0.024,  $P = 9.1 \times 10^{-4}$ ). This is consistent  
471 with the known relationship between fertility and energy metabolism, involving hormone  
472 secretion, which is largely regulated by the brain. However, previous studies have specifically  
473 linked fertility-related hormonal dysregulation to the hypothalamus and brainstem<sup>22,23</sup>.

474

475 Total protein and fibroblasts ( $\pi_{t'} = 0.079$ , s.e. = 0.025,  $P = 7.0 \times 10^{-4}$ ) and whole blood ( $\pi_{t'} =$   
476  $0.081$ , s.e. = 0.027,  $P = 1.5 \times 10^{-3}$ ). Fibroblasts are cells that play diverse roles across the  
477 tissues of the body, markedly producing protein complexes that constitute the extracellular  
478 matrices that define the structure of fibroblasts<sup>24</sup>. Serum protein is a quantity measured from  
479 whole blood, explaining the second relationship.

480

481 Cerebral cortex surface area and fibroblasts ( $\pi_{t'} = 0.10$ , s.e. = 0.034,  $P = 1.8 \times 10^{-3}$ ). Tissue  
482 surface areas are likely related to developmental processes governing body proportions. As  
483 stated in the main text, TCSC identified fibroblasts (and skeletal muscle) as causal tissues for  
484 height, the most commonly studied anthropometric phenotype, which suggests that  
485 fibroblasts, as a connective tissue, likely regulates the growth of different organs and tissues.

486

487 Lipid traits and liver: AST ( $\pi_{t'} = 0.077$ , s.e. = 0.025,  $P = 9.2 \times 10^{-4}$ ), RBC width ( $\pi_{t'} = 0.077$ , s.e.  
488 = 0.027,  $P = 1.9 \times 10^{-3}$ ), total cholesterol ( $\pi_{t'} = 0.14$ , s.e. = 0.044,  $P = 5.3 \times 10^{-4}$ ), Bilirubin  
489 ( $\pi_{t'} = 0.11$ , s.e. = 0.036,  $P = 1.0 \times 10^{-3}$ ). These causal tissue-trait pairs are reasonable as the  
490 liver is the production center of cholesterol and phospholipids.

491

492 Blood cell traits and whole blood: eosinophil count ( $\pi_{t'} = 0.17$ , s.e. = 0.052,  $P = 6.5 \times 10^{-4}$ ),  
493 lymphocyte count ( $\pi_{t'} = 0.22$ , s.e. = 0.053,  $P = 2.1 \times 10^{-5}$ ), monocyte count ( $\pi_{t'} = 0.25$ , s.e. =  
494  $0.078$ ,  $P = 7.5 \times 10^{-4}$ ). These causal tissue-trait pairs are reasonable as these different blood  
495 cell populations are present in whole blood.

496

497 MDD (Major depressive disorder) and whole blood ( $\pi_{t'} = 0.068$ , s.e. = 0.022,  $P = 1.3 \times 10^{-3}$ ).  
498 This is consistent with reports of elevated immune system cytokines in MDD cases<sup>25</sup>.

499

### 500 ***Secondary analysis of tissue-specific contributions to diseases and complex traits (N = 320*** 501 ***tissues only)***

502

503 Tissues with smaller eQTL sample size may be underpowered in TCSC analysis. This prompted  
504 us to remove tissues with eQTL sample size less than 320 individuals. The number of causal  
505 tissue-trait pairs with significantly positive contributions to disease/trait heritability (at 5% FDR)  
506 increased from 21 to 23, likely due to a decrease in multiple hypothesis testing burden from  
507 removing underpowered tissues. The 23 significant tissue-trait pairs reflect a gain of 8 newly  
508 significant tissue-trait pairs (and a loss of 6 formerly significant tissue-trait pairs, of which 5  
509 were lost because the tissue was removed), but estimates of  $\pi_{t'}$  for each significant tissue-trait  
510 pair were not statistically different from our primary analysis (**Supplementary Table 9**).

511 Notably, among the newly significant tissue-trait pairs, whole blood was associated with  
512 hypothyroidism ( $\pi_{t'} = 0.100$ , s.e. = 0.032,  $P = 8.9 \times 10^{-4}$ ); we note that thyroid had a  
513 quantitatively large but only nominally significant association ( $\pi_{t'} = 0.452$ , s.e. = 0.225,  $P = 0.02$ ,  
514 FDR = 26%). Esophagus muscularis (rather than lung tissue) was associated with the lung trait  
515 FEV1/FVC<sup>26</sup> ( $\pi_{t'} = 0.167$ , s.e. = 0.056,  $P = 1.4 \times 10^{-3}$ ). This result may be explained by the fact  
516 that smooth muscle in the lung is known to affect FEV1/FVC and influence pulmonary disease  
517 pathophysiology<sup>27</sup>, and this unobserved causal tissue is likely highly co-regulated with the  
518 smooth muscle of the esophagus, which is indeed the site from which the GTEx study sampled  
519 the esophagus muscularis tissue<sup>5</sup>. Other newly significant findings are discussed below and  
520 numerical results for all tissues and diseases/traits are reported in **Supplementary Table 8**.

521  
522 BMI and tibial nerve: This is broadly consistent with the role of the central nervous system in  
523 BMI<sup>28,17,29,30,2,31</sup>, although the precise causal relationship that might exist between tibial nerve  
524 and BMI is not straightforward.

525  
526 Additional causal tissues for platelet count identified in this secondary analysis include brain  
527 cortex, esophagus muscularis, and fibroblasts. Regarding the brain, platelets are often found in  
528 blood vessels and are key participants in thrombosis, or the clotting of blood vessels<sup>32,33</sup>.  
529 Moreover, platelets have been linked to inflammation of death of neurons in the cortex and  
530 hippocampus<sup>34</sup>. Regarding the esophagus muscularis, high platelet counts are associated with  
531 greater severity of esophageal cancer, likely due to the angiogenic properties of platelets, e.g.  
532 creating new blood vessels<sup>35</sup>. Regarding fibroblasts, these cells are known to be recruited to  
533 sites of blood clots, caused by platelets, to remedy the clot<sup>36</sup>. Therefore, increased presence of  
534 fibroblasts likely reduces platelet activity in individuals with greater susceptibility to vascular  
535 clotting. While it is possible that platelet count may have a diverse tissue-specific genetic basis,  
536 this result could also be caused by an absent causal tissue or cell type that is co-regulated with  
537 these three newly detected tissues.

538  
539 Sleep duration and breast tissue: melatonin is a hormone whose levels are considered  
540 protective for breast cancer risk<sup>37</sup>. Melatonin is also a common supplement taken to promote  
541 sleep. However, melatonin is produced in the brain, and therefore the causal relationship from  
542 breast tissue to sleep duration is unclear.

543  
544 Height with fibroblasts and muscle skeletal tissue. Skin tissue has been shown to widely express  
545 growth factors, including embryonic growth factor which plays a key role in fetal  
546 development<sup>38</sup>. Fibroblasts are the predominant cell type of skin tissue. Skeletal muscle is one  
547 of the most likely causal tissues for anthropometric, or skeletal growth, traits such as height,  
548 consistent with previous genetic studies identifying enrichments of height-associated genetic  
549 variation near genes regulated in skeletal muscle<sup>17,2</sup>, which includes colocalization with eQTLs  
550 regulating key growth factors such as IGFBP-3<sup>39</sup>.

551  
552 RBC count with fibroblasts and whole blood: Red blood cells and fibroblasts work together  
553 during tissue remodeling processes of extracellular matrices<sup>40,41</sup>. However, these studies  
554 suggest that red blood cells stimulate fibroblasts to secrete important tissue remodeling

555 molecules, such as interleukin-8 and metalloproteinases. As a blood cell population, the causal  
556 relationship between whole blood and red blood cell count is expected.

557

558 Eosinophil count with fibroblasts and muscle skeletal tissue: Similar to the role of red blood  
559 cells in tissue remodeling described above, eosinophils also interact with fibroblasts in tissue  
560 remodeling and fibrosis, although typically in response to inflammation and allergy<sup>42</sup>.

561 Eosinophils have previously been implicated in myopathy, or muscular disease<sup>43</sup>, likely due to  
562 their recruitment in response to allergy, infection, or cancer.

563

564 Testosterone and muscle skeletal tissue: atrophy of skeletal muscle is associated with lower  
565 levels of testosterone, a hormone produced by the testes and understood to be regulated by  
566 brain tissues<sup>44,45</sup>. These studies suggest that there is a causal relationship of testosterone on  
567 muscle skeletal tissue, rather than the reverse relationship suggested by TCSC.

568

### 569 ***Secondary analysis of brain-specific contributions to diseases and complex traits***

570 While a subset of our diseases/traits are psychiatric and behavioral phenotypes, we sought to  
571 increase the power of our TCSC analysis by restricting tissues to those that are in the brain. We  
572 identified 41 independent brain-related traits, reflecting a less stringent squared genetic  
573 correlation threshold of 0.25. We relaxed our threshold so that we would have a substantial  
574 number of brain traits to analyze, as many would have been excluded under the original threshold of  
575 0.1. The 13 GTEx brain tissues were analyzed without merging tissues into meta-tissues, and  
576 irrespective of eQTL sample size (range:  $N = 101-189$  individuals); we expected power to be  
577 limited due to the eQTL small sample sizes and substantial co-regulation among individual brain  
578 tissues. TCSC identified 8 brain tissue-brain trait pairs at 5% FDR (**Extended Data Fig. 8,**  
579 **Supplementary Table 12**). For ADHD, TCSC identified brain hippocampus as a causal tissue  
580 ( $\pi_{t'} = 0.127$ , s.e. = 0.045,  $P = 2.5 \times 10^{-3}$ ), consistent with the correlation between  
581 hippocampal volume and ADHD diagnosis in children<sup>46</sup>. A recent ADHD GWAS identified a locus  
582 implicating the *FOXP2* gene<sup>47</sup>, which has been reported to regulate dopamine secretion in  
583 mice<sup>48</sup>; hippocampal activation results in the firing of dopamine neurons<sup>49</sup>. For BMI, TCSC  
584 identified brain amygdala ( $\pi_{t'} = 0.054$ , s.e. = 0.023,  $P = 8.3 \times 10^{-3}$ ) and brain cerebellum ( $\pi_{t'} =$   
585  $0.039$ , s.e. = 0.016,  $P = 7.0 \times 10^{-3}$ ) as causal tissues, consistent with previous work linking the  
586 amygdala to obesity and dietary self-control<sup>50</sup>, although no previous study has implicated the  
587 amygdala in genetic regulation of BMI. As for brain cerebellum, previous research has  
588 implicated the cerebellar function in dietary behavior, rather than strictly regulation motor  
589 control function<sup>20,19,21</sup>. We note that the brain-specific analysis is expected to have greater  
590 power to identify tissue-trait pairs than the analysis of **Fig. 3** due to the smaller number of total  
591 tissues in the model (as simulations show higher power for TCSC when there are fewer tagging  
592 tissues; **Extended Data Fig. 5**). Numerical results for all brain tissues and brain traits analyzed  
593 are reported in **Supplementary Table 12**.

594

595 Caudate volume and accumbens: In individuals with major depressive disorder, the basal  
596 ganglia, of which the nucleus accumbens is a component, has an attenuated response to  
597 positive stimuli compared to healthy controls; and, it has been observed that this associates  
598 with reduced caudate volume<sup>51</sup>.

599

600 Anisotropy mode with accumbens and cerebellum: Mode of anisotropy reflects the  
601 organization of white matter fibers in the brain and is used to suggest abnormalities in brain  
602 connections<sup>52</sup>. Therefore, any brain tissue connected to white matter could be causal for  
603 morphological anisotropy mode; indeed the nucleus accumbens and cerebellum have  
604 connections to white matter<sup>53,54</sup>.

605

606 Schizophrenia with brain frontal cortex, brain cerebellum, and brain caudate. The association  
607 with the frontal cortex is consistent with previous studies reporting differences in gray and  
608 white matter volumes in schizophrenia cases vs. controls within the prefrontal cortex<sup>55,56</sup>.  
609 Previous large-scale genetic studies identified enrichments of schizophrenia-associated variants  
610 in gene sets regulating excitatory and inhibitory neurons<sup>2,57,58</sup>, but did not distinguish the origin  
611 of this enrichment among the cortex, hippocampus, and amygdala. The association with the  
612 cerebellum might be due to its large proportion of neurons, and is also consistent with previous  
613 reports of decreased blood flow within the cerebellum in schizophrenia patients<sup>59</sup>. The  
614 association with caudate is consistent with early studies reporting schizophrenia-like  
615 characteristics in patients with damaged caudate projections<sup>60,61</sup>. While TCSC often identifies  
616 one causal tissue for a given trait, the identification of three causal tissues for schizophrenia  
617 may reflect a diverse tissue-specific genetic basis for the disease, the absence of the true causal  
618 tissue or cell type and its co-regulation with analyzed tissues, or the common presence of the  
619 true causal cell type among each of the three tissues.

620

621 Bipolar disorder with caudate and cerebellum: This is consistent with previous work linking  
622 reduced cerebellar volume to anxiety-related disorders<sup>62,63</sup> and is similarly consistent with  
623 previous work associating reduced caudate volumes with bipolar disorder<sup>64</sup>.

624

625 Reaction time and cerebellum: This is consistent with previous studies in patients and monkeys  
626 with reduced reaction time and cerebellar lesions<sup>65</sup>.

627

628 Cerebral cortex width with frontal cortex and spinal cord: Intuitively, the frontal cortex has a  
629 causal effect on the tissue of the same name. While the connection between spinal cord and  
630 cerebral cortex is not as straightforward, the spinal cord and hypothalamus are connected via  
631 hypothalamic projections<sup>66</sup> and hypothalamic projections to the cerebral cortex are responsible  
632 for propagating autonomic signaling<sup>67</sup>.

633

634 Starting age of smoking habit and frontal cortex: This is consistent with previous work reporting  
635 that development of the frontal cortex during adolescence is associated with behaviors and  
636 lifestyle choices, such as smoking<sup>68</sup>.

637

638 Brainstem volume and spinal cord: This is consistent with the brainstem being the connection  
639 point of the brain to the spinal cord<sup>69</sup>.

640

641 ***Brain-specific comparison across RTC Coloc, LDSC-SEG and TCSC***

642

643 In the brain-specific analysis, patterns of LDSC-SEG and RTC Coloc were striking. First, LDSC-SEG  
644 did not identify heritability enrichments in any brain tissues other than cerebellum and cortex,  
645 suggesting that these two tissues are the only disease relevant parts of the brain, although this  
646 is highly unlikely. For example, for four traits LDSC-SEG produced very similar enrichments for  
647 the frontal cortex and the cortex. TCSC attributed these associations to the brain cerebellum,  
648 and in the specific case of schizophrenia, also implicated the frontal cortex. Second, six of the  
649 ten brain traits, for which TCSC identified a causal tissue at 10% FDR, had no associated tissue  
650 according to LDSC-SEG; these traits coincided with traits not analyzed by the RTC Coloc study.  
651 We note that the RTC Coloc study did not analyze all GTEx tissues; brain amygdala, spinal cord,  
652 and substantia nigra were omitted from their study. Lastly, RTC Coloc found 8 of 8 tested  
653 tissues shown in **Extended Data Fig. 10** to be associated with schizophrenia and four of 8 tested  
654 tissues to be associated with BMI, a superset of the tissues implicated by TCSC.

655

### 656 ***Extended analysis of tissue-specific contributions to genetic covariance***

657

658 We note that the direction of effect of tissue-specific contributions to the genetic covariance  
659 between two traits may be in the opposite direction of the global covariance between two  
660 traits, analogous to how local contributions to genome-wide genetic correlation may be in the  
661 opposite direction of the genome-wide genetic correlation<sup>70-73</sup>.

662

663 Before discussing all significant findings, we discuss two particularly compelling examples. First,  
664 brain substantia nigra had a significantly negative contribution to the genetic covariance of age  
665 at first birth and height ( $\zeta_{t'} = -0.11$ , s.e. = 0.032,  $P = 4.5 \times 10^{-4}$ ). Previous work in *C. elegans*  
666 reported that fecundity is positively regulated by dopamine<sup>74,75</sup>, which is produced in the  
667 substantia nigra<sup>76</sup>. Therefore, it is plausible that reproductive outcomes related to fecundity,  
668 such as age at first birth, are also regulated by dopamine via the substantia nigra. Dopamine  
669 also plays a role in regulating the levels of key growth hormones such as IGF-1 and IGF-BP3<sup>77</sup>  
670 and has been previously shown to be associated with height<sup>78</sup>. Second, pituitary had a  
671 significantly negative contribution to the genetic covariance of vitamin D and WHR | BMI ( $\zeta_{t'} =$   
672  $-0.19$ , s.e. = 0.057,  $P = 4.5 \times 10^{-4}$ ). Irregularities in pituitary development are associated with  
673 decreased vitamin D levels and decreased IGF-1 levels, the latter of which is integral for bone  
674 development and is directly proportional to body proportion phenotypes such as WHR | BMI<sup>79-</sup>  
675 <sup>81</sup>.

676

677 Negative contribution of brain cortex to the genetic covariance of neuroticism and years of  
678 education ( $\zeta_{t'} = -0.10$ , s.e. = 0.029,  $P = 2.1 \times 10^{-4}$ ). When certain personality traits underlie  
679 neuroticism, such as conscientiousness, neuroticism has been shown to be positively correlated  
680 with educational success<sup>82</sup>. The specific implication of the brain cortex, as opposed to other  
681 brain tissues, has not be reported previously in the literature.

682

683 Positive contribution of the brain spinal cord to the genetic covariance of type 2 diabetes (T2D)  
684 and vitamin D ( $\zeta_{t'} = 0.17$ , s.e. = 0.052,  $P = 5.5 \times 10^{-4}$ ). Vitamin D is a known neurosteroid,  
685 which affects various brain functions including calcium signaling and cellular differentiation<sup>83</sup>,



686 and reduced vitamin D is a prominent risk factor for infectious diabetes as well as diabetes  
687 mellitus (a subset of which is T2D)<sup>84</sup>, explaining the negative covariance identified by TCSC.

688  
689 Negative contribution of breast tissue to the genetic covariance of white blood cell count and  
690 BMI ( $\zeta_{t'} = -0.16$ , s.e. = 0.041,  $P = 4.1 \times 10^{-5}$ ). This observation is consistent with many previous  
691 studies reporting an association of elevated white blood cell counts with breast cancer, as these  
692 cells are a biomarker of inflammation and are predictive of other cancers and cardiovascular  
693 disease<sup>85-87</sup>. One of these studies investigated this relationship in the context of BMI and found  
694 that in premenopausal women, individuals with lower BMI and breast cancer had elevated  
695 white blood cell counts<sup>87</sup>. This direction of effect is consistent with TCSC's detection of tissue-  
696 specific negative covariance between white blood cell count and BMI, despite a genome-wide  
697 positive genetic correlation of these two traits.

698  
699 Negative contribution of lung to the genetic covariance of age at first birth and intelligence ( $\zeta_{t'}$   
700 = -0.096, s.e. = 0.026,  $P = 1.2 \times 10^{-4}$ ). First, previous work has found that older age at first birth  
701 is associated with reduced risk of lung cancer involving regulation by steroid hormones; and  
702 while some studies consider age at first birth to be a causal protective factor, this relationship  
703 might be better explained by reverse causality<sup>88-91</sup>. Indeed, TCSC is not impacted by reverse  
704 causality as phenotype cannot influence gene expression-modifying genetic variation. Second,  
705 positive health outcomes, including lung function, are genetically associated with cognitive  
706 traits in GWAS, although the causal mechanisms are poorly understood<sup>92-94</sup>. However, the  
707 direction of effect estimated by TCSC is inconsistent with these findings, possibly suggesting  
708 distinct causal mechanisms of lung tissue on these traits.

709  
710 Negative contribution of lung to the genetic covariance of intelligence and years of education  
711 ( $\zeta_{t'} = -0.045$ , s.e. = 0.013,  $P = 2.2 \times 10^{-4}$ ). As stated above, we would expect lung genes with a  
712 positive effect on intelligence to have a consistent direction of effect on years of education.  
713 While this is not what TCSC concludes, this may suggest distinct causal mechanisms of lung  
714 tissue on these traits.

715  
716 Negative contribution of pituitary to the genetic covariance of vitamin D and WHRadjBMI ( $\zeta_{t'}$  =  
717 -0.19, s.e. = 0.057,  $P = 4.5 \times 10^{-4}$ ). Previous work has established a relationship between  
718 vitamin D and bone structure development, which is directly related to WHRadjBMI<sup>80</sup>. Other  
719 work has suggested that this may be due to the positive correlation between vitamin D levels  
720 and growth hormone levels, such as IGF-1<sup>79</sup>. Moreover, irregularities in pituitary development  
721 (specifically pituitary stalk interruption syndrome) are associated with reduced IGF-1, in which  
722 individuals also have reduced serum levels of vitamin D<sup>81</sup>.

723  
724 Contributions to the genetic covariance of eosinophil count and platelet count by lung ( $\zeta_{t'} = -$   
725 0.20, s.e. = 0.068,  $P = 1.5 \times 10^{-3}$ ), ovary ( $\zeta_{t'} = -0.15$ , s.e. = 0.052,  $P = 2.2 \times 10^{-3}$ ), skin ( $\zeta_{t'} =$   
726 0.28, s.e. = 0.087,  $P = 7.1 \times 10^{-4}$ ), and whole blood ( $\zeta_{t'} = 0.30$ , s.e. = 0.105,  $P = 2.2 \times 10^{-3}$ ).  
727 Eosinophils and platelets are highly co-regulated, with eosinophils secreting platelet-activating  
728 enzymes<sup>95</sup>. Therefore, it is expected that across multiple tissues, genes have pleiotropic effects

729 on eosinophil count and platelet counts. It is also possible that such genes have a direct effect  
730 on eosinophil count and a secondary effect mediated by eosinophils on platelet count.

731

732 Negative contribution of vagina to the genetic covariance of testosterone and vitamin D ( $\zeta_{t'} = -$   
733  $0.25$ , s.e. =  $0.079$ ,  $P = 6.5 \times 10^{-4}$ ). Previous work has shown that vaginal tissue growth and  
734 differentiation were improved as a result of increased vitamin D levels<sup>96</sup>. Similarly, testosterone  
735 is a hormone that plays a key role in healthy vaginal function<sup>97</sup>. Since TCSC detected negative  
736 covariance for these two traits, it is likely that they are regulated by distinct sets of genes.

737

738 Negative contribution of whole blood to the genetic covariance of age at first birth and  
739 rheumatoid arthritis ( $\zeta_{t'} = -0.17$ , s.e. =  $0.053$ ,  $P = 6.6 \times 10^{-4}$ ). The association between  
740 rheumatoid arthritis (RA) and whole blood, which is comprised of many immune cell types, is  
741 logical. However, previous work has not reported an association between whole blood, or the  
742 immune system, and age at first birth. Moreover, it is not immediately clear why genes that  
743 increase risk for RA would also increase age at first birth. We hypothesize that the underlying  
744 mechanism pertains to age-related changes in an individual's immune system which might  
745 affect reproductive behavior later in life, as risk for RA and other autoimmune diseases  
746 increases.

747

748 Negative contribution of spleen to the genetic covariance of major depressive disorder (MDD)  
749 and BMI ( $\zeta_{t'} = -0.29$ , s.e. =  $0.039$ ,  $P = 7.3 \times 10^{-4}$ ). As discussed above, whole blood was  
750 detected as causal tissue for MDD likely due to the role of the cytokines in regulation of MDD;  
751 the spleen plays a key role in the immune system. It is widely known that obesity, or high BMI,  
752 is associated with irregularities in immune cell counts<sup>98</sup>.

753

754 Negative contribution of coronary artery to the genetic covariance of years of education and  
755 menopause age ( $\zeta_{t'} = -0.13$ , s.e. =  $0.115$ ,  $P = 7.3 \times 10^{-4}$ ). This is consistent with previous work  
756 indicating that reduced coronary artery disease risk is associated with more years of education  
757 via a Mendelian randomization study<sup>99</sup>. Late menopause is considered a protective factor  
758 coronary artery disease<sup>100</sup>. This biological consistency would suggest a positive covariance,  
759 therefore we might conclude that distinct sets of genes regulate years of education and  
760 menopause age in coronary artery.

761

762 Positive contribution of aorta artery to the genetic covariance of mode of anisotropy and  
763 menopause age ( $\zeta_{t'} = 0.27$ , s.e. =  $0.084$ ,  $P = 7.8 \times 10^{-4}$ ). Previous work has associated  
764 calcification in the aorta with bone loss, specifically in postmenopausal women<sup>101</sup>. Mode of  
765 anisotropy, from brain MRI which is a measure of structural cellular organization, is not a well-  
766 studied complex trait and has a lack of literature evidence to support any role for aorta, and  
767 similarly for any other tissue.

768

769 Contributions to the genetic covariance of anorexia and insomnia by tibial nerve ( $\zeta_{t'} = 0.20$ , s.e.  
770 =  $0.063$ ,  $P = 7.8 \times 10^{-4}$ ), testis ( $\zeta_{t'} = 0.18$ , s.e. =  $0.062$ ,  $P = 1.7 \times 10^{-3}$ ), and whole blood ( $\zeta_{t'} = -$   
771  $0.14$ , s.e. =  $0.053$ ,  $P = 3.9 \times 10^{-3}$ ). The explanation for tibial nerve can be found in the main  
772 text. The association with whole blood might be explained by previous work demonstrating the

773 role of the immune system in anorexia<sup>102</sup> and insomnia<sup>103</sup>. The immune regulation impacting  
774 insomnia is specifically discussed in the context of the central nervous system, further  
775 supporting the association with the tibial nerve, a central nervous system tissue. Testis size has  
776 also been associated with sleep irregularities<sup>104</sup>. Separately, the reduced production of the  
777 androgen hormone in the testis, or hypogonadism, is a comorbidity of male anorexia<sup>105</sup>.

778

779 Negative contribution of prostate to the genetic covariance of medication use and years of  
780 education ( $\zeta_{t'} = -0.075$ , s.e. = 0.024,  $P = 7.8 \times 10^{-4}$ ). This is consistent with previous studies  
781 establishing a negative association between drug use and prostate health outcomes<sup>106</sup>. The  
782 positive covariance detected with years of education is not supported by any literature  
783 evidence and could be a false positive.

784

785 Positive contribution of muscle skeletal to the genetic covariance of brain accumbens volume  
786 and caudate volume ( $\zeta_{t'} = 0.20$ , s.e. = 0.063,  $P = 8.0 \times 10^{-4}$ ). Previous work indicates that  
787 musculoskeletal tissue likely influences biological processes the brain via regulation of energy  
788 metabolism<sup>107</sup>.

789

790 Negative contribution of muscle skeletal to the genetic covariance of total protein and  
791 WHRadjBMI ( $\zeta_{t'} = -0.27$ , s.e. = 0.084,  $P = 8.0 \times 10^{-4}$ ). This is consistent with known regulation  
792 in musculoskeletal tissue influencing waist-hip-ratio<sup>108</sup>. Musculoskeletal tissue is also related to  
793 protein levels, as restricted protein intake leads to dysregulation and morphology of skeletal  
794 muscle<sup>109</sup>.

795

796 Negative contribution of skin to the genetic covariance of height and FVC ( $\zeta_{t'} = -0.47$ , s.e. =  
797 0.155,  $P = 1.2 \times 10^{-3}$ ). Height and forced vital capacity (FVC) are genetically correlated as both  
798 are affected by body proportions and growth-regulating processes. Skin tissue has been shown  
799 to widely express growth factors, including embryonic growth factor which plays a key role in  
800 fetal development<sup>38</sup>.

801

802 Negative contribution of lung to the genetic covariance of age at first birth and menopause age  
803 ( $\zeta_{t'} = -0.20$ , s.e. = 0.067,  $P = 1.3 \times 10^{-3}$ ). This is consistent with a negative association between  
804 earlier menopause age and healthy pulmonary function<sup>110,111</sup>. As described above, older age at  
805 first birth is associated with improved lung cancer outcomes<sup>112</sup>.

806

807 Negative contribution of adipose subcutaneous to the genetic covariance of bipolar disorder  
808 and major depressive disorder ( $\zeta_{t'} = -0.18$ , s.e. = 0.051,  $P = 2.7 \times 10^{-4}$ ). This is consistent with  
809 an expanding body of literature supporting a bidirectional link between obesity and  
810 depression<sup>113</sup>.

811

812 Negative contribution of the meta-tissue brain limbic to the genetic covariance of risk tolerance  
813 and schizophrenia ( $\zeta_{t'} = -0.15$ , s.e. = 0.049,  $P = 8.5 \times 10^{-4}$ ). Risk taking (or impulsivity) has  
814 previously been linked to both schizophrenia and bipolar disorder<sup>114</sup>.

815

816 ***Extended analysis of differences in tissue-specific contributions to heritability vs. covariance***

817

818 We note that  $\zeta_{t'}$  and  $\pi_{t'}$  are both signed proportions and are therefore on the same scale, thus  
819 the scenario in which these two quantities are equal is a natural and parsimonious null.

820

821 Negative contribution of skin (sun exposed) to the genetic covariance of height and FVC: Skin  
822 does not explain a nonzero proportion of heritability for height or FVC; however, skin does  
823 explain a significant amount of positive covariance, although the genome-wide covariance of  
824 this trait pair is negative.

825

826 Negative contribution of breast to the genetic covariance of WBC count and BMI: Breast is not a  
827 causal tissue for either trait, although it does explain a significant amount of negative  
828 covariance between the two traits, although the genome-wide covariance of this trait pair is  
829 positive.

830

831 Negative contribution of brain cortex to the genetic covariance of years of education and  
832 neuroticism: Brain cortex is not a causal tissue for either trait, consistent with what we found in  
833 the brain-specific analysis. However, brain cortex explains a significant amount of positive  
834 covariance between the two traits, although the genome-wide covariance is negative.

835

836 Negative contribution of pituitary to the genetic covariance of vitamin D and WHRadjBMI:  
837 While pituitary does not explain a nonzero proportion of the heritability of either trait, it does  
838 explain a significant amount of positive covariance between the two traits, although the  
839 genome-wide covariance is negative.

840

#### 841 ***Other tissue-trait association methods***

842

843 MaxCPP models contributions to heritability enrichment of fine-mapped eQTL variants across  
844 tissues or meta-tissues<sup>115</sup>; although this approach proved powerful when analyzing eQTL effects  
845 that were meta-analyzed across all tissues, it has limited power to identify disease-critical  
846 tissues: fine-mapped eQTL annotations for blood (resp. brain) were significant conditional on  
847 annotations constructed using all tissues only when meta-analyzing results across a large set of  
848 blood (resp. brain) traits (Fig. 4 of ref.<sup>115</sup>). eQTLenrich compares eQTL enrichments of disease-  
849 associated variants across tissues<sup>116</sup>; this approach produced compelling findings for eQTL that  
850 were aggregated across tissues, but tissue-specific analyses often implicated many tissues (Fig.  
851 1d of ref.<sup>116</sup>). MESCC estimates the proportion of heritability causally mediated by gene  
852 expression in assayed tissues<sup>117</sup>; this study made a valuable contribution in its strict definition  
853 and estimation of mediated effects (see below), but did not jointly model distinct tissues and  
854 had limited power to distinguish disease-critical tissues (Fig. 3 of ref.<sup>117</sup>). CAFEH leverages multi-  
855 trait fine-mapping methods to simultaneously evaluate all tissues for colocalization with  
856 disease<sup>118</sup>; however, this locus-based approach does not produce genome-wide estimates and  
857 it remains the case that many (causal or tagging) tissues may colocalize with disease under this  
858 framework. Likewise, methods for identifying tissues associated to disease/trait covariance do  
859 not distinguish causal tissues from tagging tissues<sup>119,120</sup>.

860

861 **Other limitations**

862  
863  
864  
865  
866  
867  
868  
869  
870  
871  
872  
873  
874  
875  
876  
877  
878  
879  
880  
881  
882  
883  
884  
885  
886  
887  
888  
889  
890  
891  
892  
893  
894  
895  
896  
897  
898  
899  
900  
901  
902  
903

1. TCSC has low power at small eQTL sample sizes; in addition, TCSC estimates are impacted by the number of significantly *cis*-heritable genes in a focal tissue, which can lead to conservative bias at small eQTL sample sizes. We anticipate that these limitations will become less severe as eQTL sample sizes increase.
2. TCSC is susceptible to large variations in eQTL sample size, which may compromise type I error; therefore, there is a tradeoff between maximizing the number of tissues analyzed and limiting the variation in eQTL sample size.
3. TCSC assumes that causal gene expression-disease effects are independent across tissues; this assumption may become invalid for tissues and cell types assayed at high resolution. However, we verified via simulations that TCSC performs well when this model assumption is violated (**Supplementary Figs. 12-15**).
4. TCSC does not formally model measurement error in tissue co-regulation scores, but instead applies a heuristic bias correction. We determined that the bias correction generally performs well in simulations.
5. Eighth, TCSC does not produce locus-specific estimates or identify causal tissues at specific loci. However, genome-wide results from TCSC may be used as a prior for locus-based methods (analogous to GWAS fine-mapping with functional priors<sup>121</sup>).
6. We did not apply TCSC to single-cell RNA-seq (scRNA-seq) data, which represents a promising new direction as scRNA-seq sample sizes increase<sup>122-124,6</sup>; we caution that scRNA-seq data may require new eQTL modeling approaches<sup>122</sup>.
7. Finally, we focused our cross-trait analyses on relatively independent traits from the single-trait analysis, to enable comparisons with single-trait results (**Fig. 5B, 5C**); cross-trait analysis of more strongly genetically correlated traits is a future direction of high interest.

904 **Supplementary Figures**

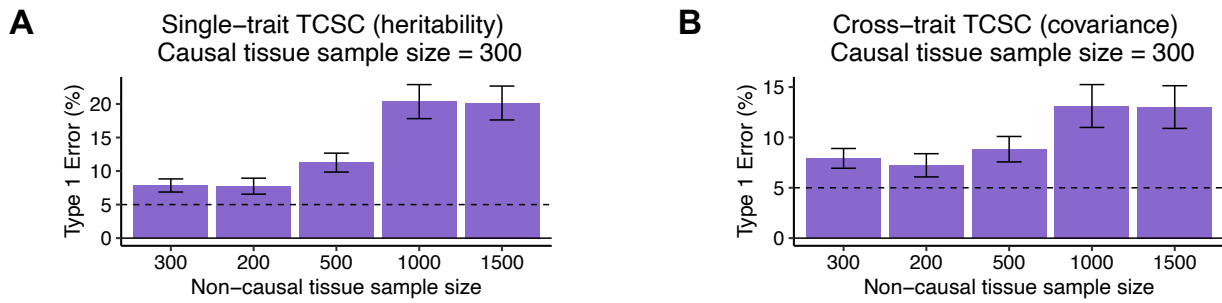

905  
906 **Supplementary Figure 1. Type I error of TCSC regression in simulations with large variations in**  
907 **eQTL sample size of non-causal tissues.** We performed  $n = 1,000$  independent simulated  
908 genetic architectures in which each simulation had one causal tissue (gene expression sample  
909 size = 300 individuals) and nine non-causal tissues with the following sample sizes: 300, 200,  
910 300, 500, 1,000, 1500, 200, 300, 500. (A) We report the false positive rate for non-causal tissues  
911 as  $h_{ge(t_i)}^2 > 0$  at  $p < 0.05$  which is not well-controlled, demonstrating the need for comparable  
912 gene expression sample sizes across tissues in TCSC. (B) We report the false positive rate for  
913 non-causal tissues as  $\omega_{ge(t_i)} > 0$  at  $p < 0.05$  which is not well-controlled, demonstrating the  
914 need for comparable gene expression sample sizes across tissues in TCSC. For panels A and B,  
915 we used a one-sided z-test and the genomic block jackknife standard error to obtain p-values  
916 and data are presented as mean values  $\pm 1.96 \times \text{SEM}$ .  
917

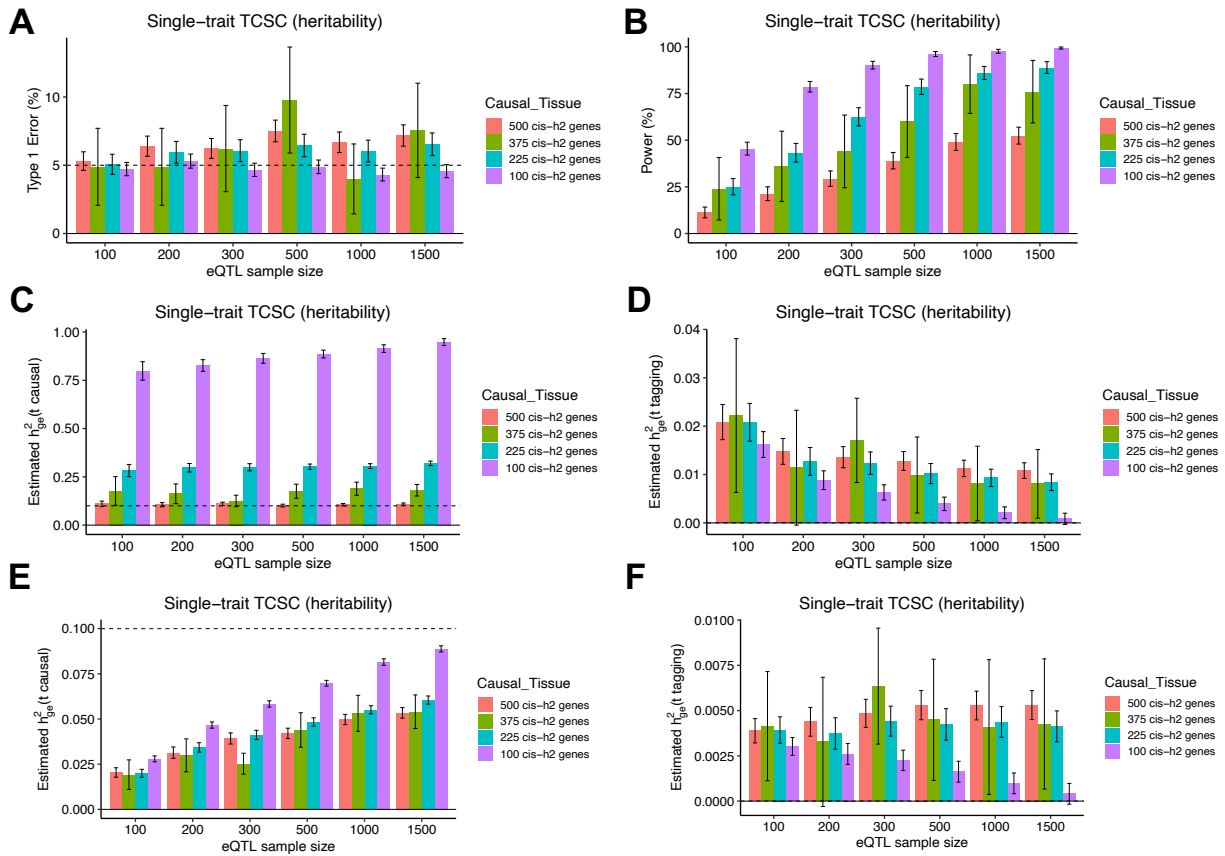

**Supplementary Figure 2. Robustness and power of TCSC regression in simulations when the causal tissue has fewer cis-heritable genes than tagging tissues.** (A) Type I error when changing the number of expressed genes in the causal tissue. False positive event is defined as  $h^2_{ge(tr)} > 0$  for non-causal tissues at  $p < 0.05$ . (B) Power to detect the causal tissue per scenario. A true positive event is defined as  $h^2_{ge(tr)} > 0$  for causal tissues at  $p < 0.05$ . (C) Bias on causal estimates of  $h^2_{ge(tr)}$  for different scenarios. (D) Bias on non-causal estimates of  $h^2_{ge(tr)}$  for different scenarios. (E) Bias on causal estimates of  $h^2_{ge(tr)}$  for different scenarios. (F) Bias on non-causal estimates of  $h^2_{ge(tr)}$  for different scenarios. For panels C and D,  $G_{tr}$  is set to the total number of unique *cis*-heritable genes across all tissues. For panels E and F,  $G_{tr}$  is set to the number of significantly *cis*-heritable genes detected in each tissue. For panels C and E, dashed lines indicate true value of  $h^2_{ge(tr)}$ . In all panels, we performed  $n = 1,000$  independent simulated genetic architectures across different eQTL sample sizes ( $n = 100, 200, 300, 500, 1000, 1500$ ); we used a one-sided z-test and the genomic block jackknife standard error to obtain p-values and data are presented as mean values  $\pm 1.96 \times \text{SEM}$ .

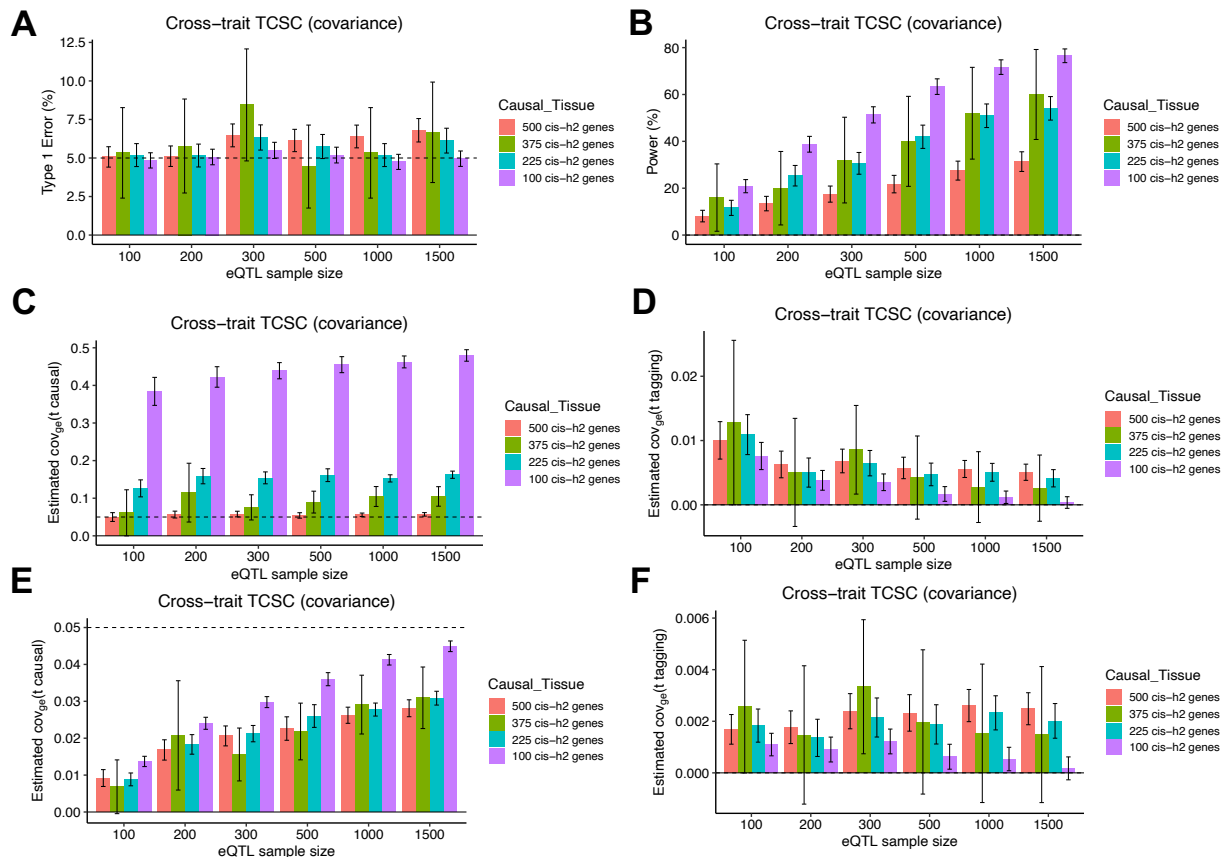

935  
 936 **Supplementary Figure 3. Robustness and power of TCSC regression in simulations when the**  
 937 **causal tissue has fewer cis-heritable genes than tagging tissues.** (A) Type I error when  
 938 changing the number of expressed genes in the causal tissue. False positive event is defined as  
 939  $\omega_{ge(tr)} > 0$  for non-causal tissues at  $p < 0.05$ . (B) Power to detect the causal tissue per scenario.  
 940 A true positive event is defined as  $\omega_{ge(tr)} > 0$  for causal tissues at  $p < 0.05$ . (C) Bias on causal  
 941 estimates of  $\omega_{ge(tr)}$  for different scenarios. (D) Bias on non-causal estimates of  $\omega_{ge(tr)}$  for  
 942 different scenarios. (E) Bias on causal estimates of  $\omega_{ge(tr)}$  for different scenarios. (F) Bias on  
 943 non-causal estimates of  $\omega_{ge(tr)}$  for different scenarios. For panels C and D,  $G_{tr}$  is set to the total  
 944 number of unique *cis*-heritable genes across all tissues. For panels E and F,  $G_{tr}$  is set to the  
 945 number of significantly *cis*-heritable genes detected in each tissue. For panels C and E, dashed  
 946 lines indicate true value of  $\omega_{ge(tr)}$ . In all panels, we performed  $n = 1,000$  independent simulated  
 947 genetic architectures across different eQTL sample sizes ( $n = 100, 200, 300, 500, 1000, 1500$ );  
 948 we used a one-sided z-test and the genomic block jackknife standard error to obtain p-values  
 949 and data are presented as mean values  $\pm 1.96 \times \text{SEM}$ .

950  
 951  
 952  
 953  
 954



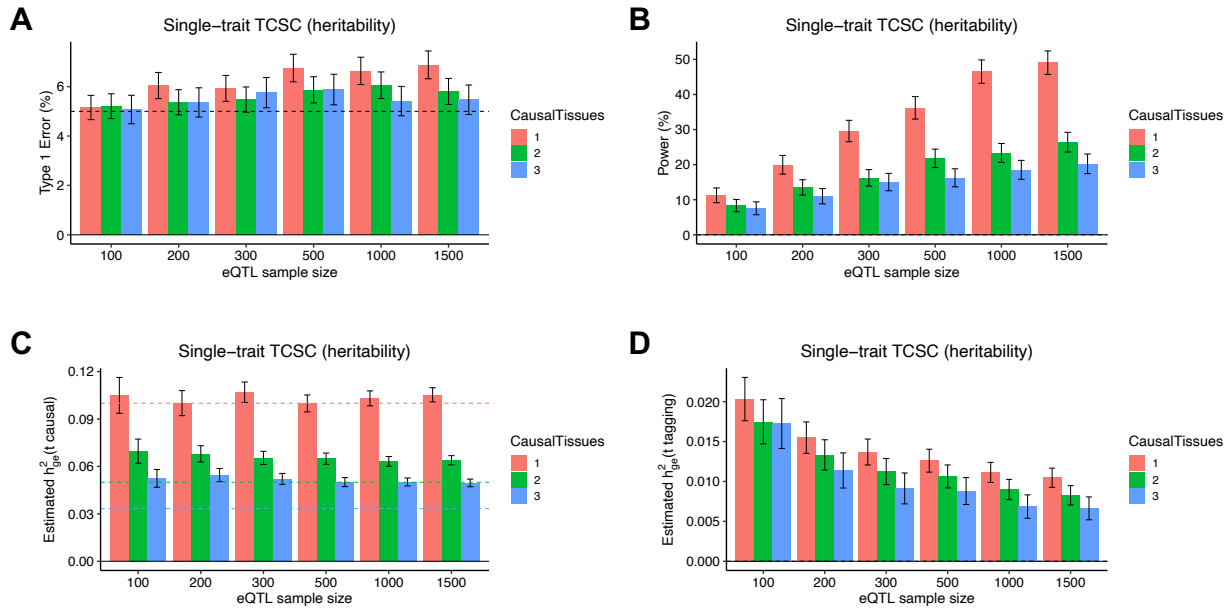

955  
956

957 **Supplementary Figure 4. Robustness and power of TCSC regression in simulations with**  
 958 **different numbers of causal tissues.** (A) Type I error for each different causal tissue  
 959 architecture. A single causal tissue (pink) represents the primary simulation analysis. Other  
 960 architectures include two causal tissues (green) and three causal tissues (blue). False positive  
 961 event defined as  $h^2_{ge(tr)} > 0$  for non-causal tissues at  $p < 0.05$ . (B) Power to detect the causal  
 962 tissue, defined by  $h^2_{ge(tr)} > 0$  for causal tissues at  $p < 0.05$ . (C) Bias on estimates of  $h^2_{ge(tr)}$  in  
 963 causal tissues for different numbers of causal tissues in the model. The dashed line indicates  
 964 that the true value of  $h^2_{ge(tr)} = 0.1$ . (D) Bias on estimates of  $h^2_{ge(tr)}$  in non-causal tissues for  
 965 different numbers of causal tissues in the model. In all panels, we performed  $n = 1,000$   
 966 independent simulated genetic architectures across different eQTL sample sizes ( $n = 100, 200,$   
 967  $300, 500, 1000, 1500$ ); we used a one-sided z-test and the genomic block jackknife standard  
 968 error to obtain p-values and data are presented as mean values  $\pm 1.96 \times \text{SEM}$ . The value of  $G_{tr}$   
 969 is set to the total number of unique *cis*-heritable genes across all tissues.  
 970

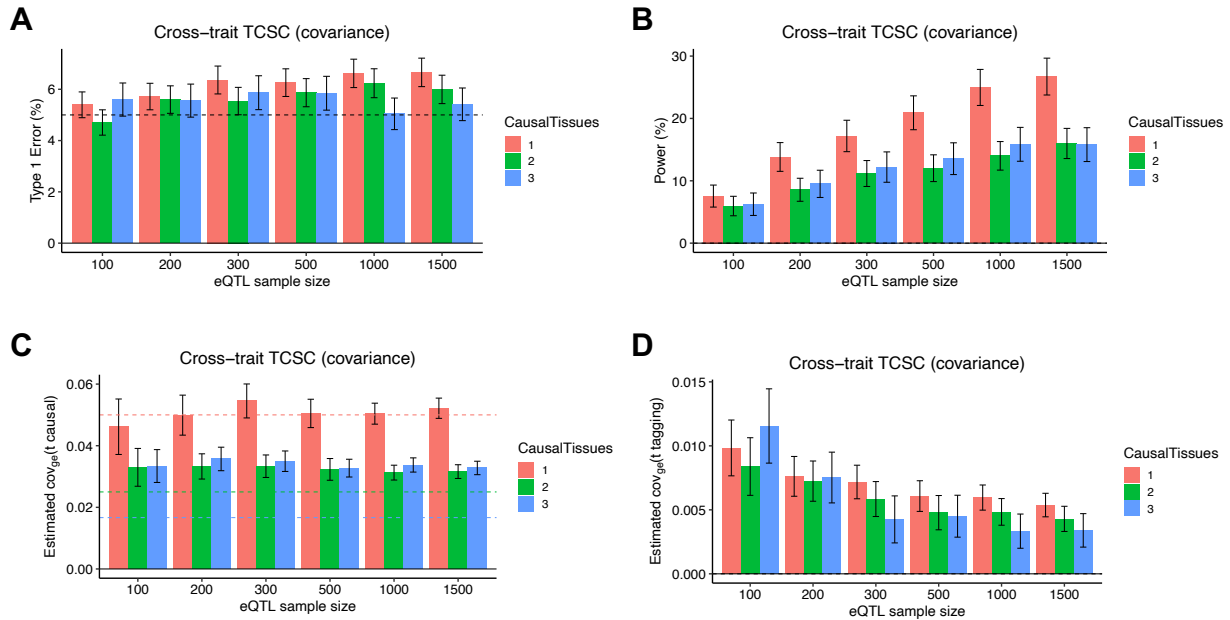

971  
 972 **Supplementary Figure 5. Robustness and power of cross-trait TCSC regression in simulations**  
 973 **with different numbers of causal tissues.** (A) Type I error for each different causal tissue  
 974 architecture. A single causal tissue (pink) represents the primary simulation analysis. Other  
 975 architectures include two causal tissues (green) and three causal tissues (blue). False positive  
 976 event defined as  $\omega_{ge(tr)} > 0$  for non-causal tissues at  $p < 0.05$ . (B) Power to detect the causal  
 977 tissue, defined by  $\omega_{ge(tr)} > 0$  for causal tissues at  $p < 0.05$ . (C) Bias on estimates of  $\omega_{ge(tr)}$  in  
 978 causal tissues for different numbers of causal tissues in the model. The dashed line indicates  
 979 that the true value of  $\omega_{ge(tr)} = 0.05$ . (D) Bias on estimates of  $\omega_{ge(tr)}$  in non-causal tissues for  
 980 different numbers of causal tissues in the model. In all panels, we performed  $n = 1,000$   
 981 independent simulated genetic architectures across different eQTL sample sizes ( $n = 100, 200,$   
 982  $300, 500, 1000, 1500$ ); we used a one-sided z-test and the genomic block jackknife standard  
 983 error to obtain p-values and data are presented as mean values  $\pm 1.96 \times \text{SEM}$ . The value of  $G_{tr}$   
 984 is set to the total number of unique *cis*-heritable genes across all tissues.  
 985

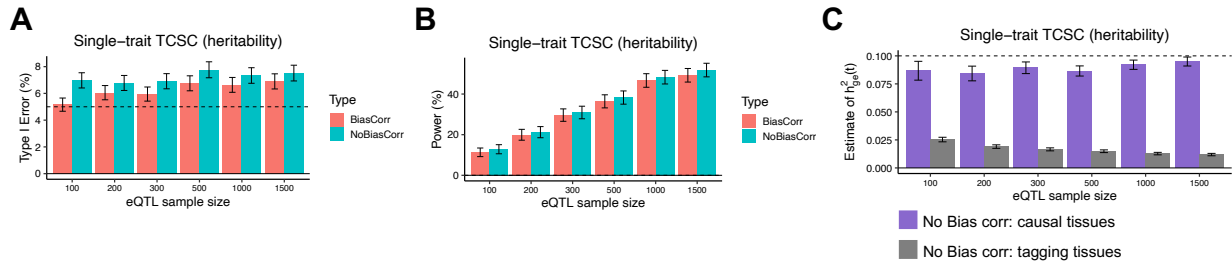

987

988

**Supplementary Figure 6. Robustness and power of TCSC regression with or without correction**

989

**for bias in tissue co-regulation scores in simulations.** (A) Type I error for each of two scenarios:

990

(1) “BiasCorr”: tissue co-regulation scores estimated using bias correction as in primary

991

simulations (pink) vs (2) “NoBiasCorr”: tissue co-regulation scores estimated without bias

992

correction (green). False positive event defined as  $h^2_{ge(tr)} > 0$  for non-causal tissues at  $p < 0.05$ .

993

(B) Power to detect the causal tissue, in which  $h^2_{ge(tr)} > 0$  for causal tissues at  $p < 0.05$ .

994

(C) Bias on estimates of causal and non-causal  $h^2_{ge(tr)}$  whose true values are 0.1 (purple bars) and 0

995

(gray bars), respectively, in the scenario of using no bias correction on tissue co-regulation

996

scores. In all panels, we performed  $n = 1,000$  independent simulated genetic architectures

997

across different eQTL sample sizes ( $n = 100, 200, 300, 500, 1000, 1500$ ); we used a one-sided z-

998

test and the genomic block jackknife standard error to obtain p-values and data are presented

999

as mean values  $\pm 1.96 \times \text{SEM}$ . The value of  $G_{tr}$  is set to the total number of unique *cis*-

1000

heritable genes across all tissues.

1001

1002

1003

1004

1005

1006

1007

1008

1009

1010

1011

1012

1013

1014

1015

1016

1017

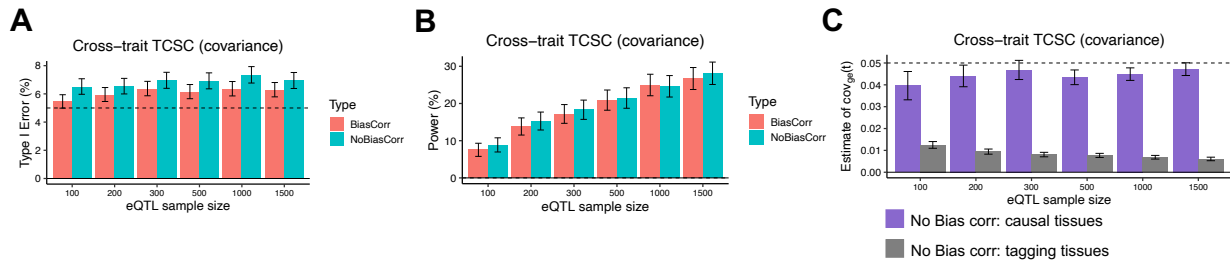

1018  
 1019 **Supplementary Figure 7. Robustness and power of cross-trait TCSC regression with or without**  
 1020 **correction for bias in tissue co-regulation scores in simulations.** (A) Type I error for each of two  
 1021 scenarios: (1) “BiasCorr”: tissue co-regulation scores estimated using bias correction as in  
 1022 primary simulations (pink) vs (2) “NoBiasCorr”: tissue co-regulation scores estimated without  
 1023 bias correction (green). False positive event defined as  $\omega_{ge(tr)} > 0$  for non-causal tissues at  $p <$   
 1024  $0.05$ . (B) Power to detect the causal tissue, in which  $\omega_{ge(tr)} > 0$  for causal tissues at  $p < 0.05$ . (C)  
 1025 Bias on estimates of causal and non-causal  $\omega_{ge(tr)}$  whose true values are  $0.05$  (purple bars) and  
 1026  $0$  (gray bars), respectively, in the scenario of using no bias correction on tissue co-regulation  
 1027 scores. In all panels, we performed  $n = 1,000$  independent simulated genetic architectures  
 1028 across different eQTL sample sizes ( $n = 100, 200, 300, 500, 1000, 1500$ ); we used a one-sided z-  
 1029 test and the genomic block jackknife standard error to obtain p-values and data are presented  
 1030 as mean values  $\pm 1.96 \times \text{SEM}$ . The value of  $G_{tr}$  is set to the total number of unique *cis*-  
 1031 heritable genes across all tissues.

1032  
 1033  
 1034  
 1035  
 1036  
 1037  
 1038  
 1039  
 1040  
 1041  
 1042  
 1043  
 1044  
 1045  
 1046  
 1047  
 1048  
 1049  
 1050

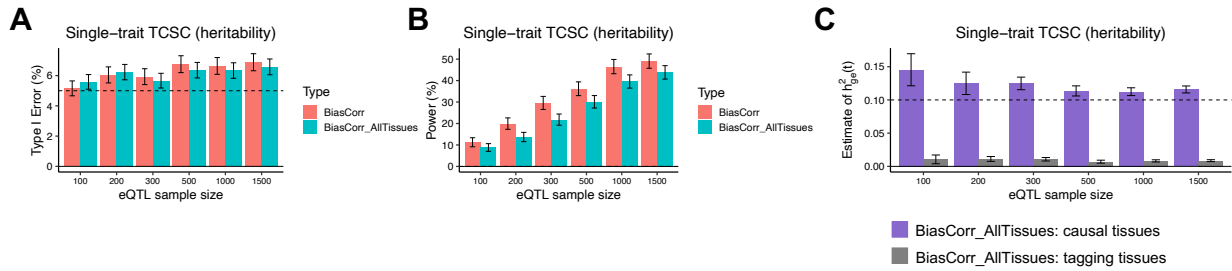

1051

1052 **Supplementary Figure 8. Robustness and power of single-trait TCSC regression without**  
 1053 **(default) or with bias correction applied to all pairs of tissues in simulations.** (A) Type I error  
 1054 for each of two scenarios: (1) “BiasCorr”: tissue co-regulation scores estimated using bias  
 1055 correction as in primary simulations, e.g. when  $t = t'$  (pink) vs (2) “BiasCorr\_AllTissues”: tissue  
 1056 co-regulation scores estimated using bias correction applied to all correlations of predicted  
 1057 gene expression (green). False positive event defined as  $h^2_{ge(t')} > 0$  for non-causal tissues at  $p <$   
 1058  $0.05$ . (B) Power to detect the causal tissue, in which  $h^2_{ge(t)} > 0$  for causal tissues at  $p < 0.05$ . (C)  
 1059 Bias on estimates of causal and non-causal  $h^2_{ge(t)}$  whose true values are 0.1 (purple bars) and 0  
 1060 (gray bars), respectively, in the scenario of using bias correction applied to all correlations of  
 1061 predicted gene expression in co-regulation scores. In all panels, we performed  $n = 1,000$   
 1062 independent simulated genetic architectures across different eQTL sample sizes ( $n = 100, 200,$   
 1063  $300, 500, 1000, 1500$ ); we used a one-sided z-test and the genomic block jackknife standard  
 1064 error to obtain p-values and data are presented as mean values  $\pm 1.96 \times \text{SEM}$ . The value of  $G_{t'}$   
 1065 is set to the total number of unique *cis*-heritable genes across all tissues.

1066

1067

1068

1069

1070

1071

1072

1073

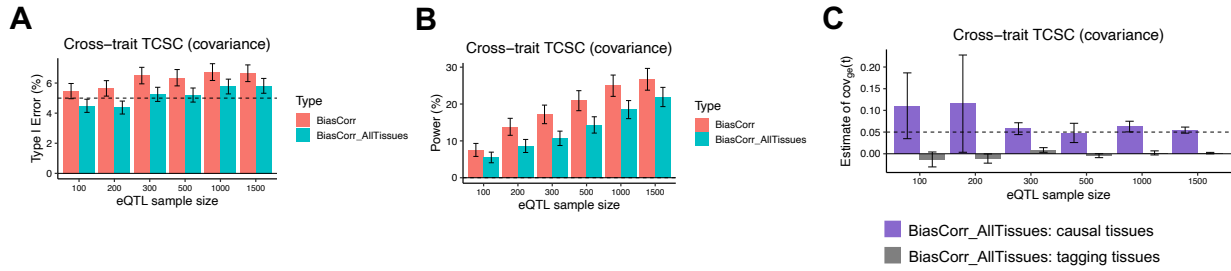

1074

1075 **Supplementary Figure 9. Robustness and power of cross-trait TCSC regression without**  
 1076 **(default) or with bias correction applied to all pairs of tissues in simulations. (A)** Type I error  
 1077 for each of two scenarios: (1) “BiasCorr”: tissue co-regulation scores estimated using bias  
 1078 correction as in primary simulations, e.g. when  $t = t'$  (pink) vs (2) “BiasCorr\_AllTissues”: tissue  
 1079 co-regulation scores estimated using bias correction applied to all correlations of predicted  
 1080 gene expression (green). False positive event defined as  $\omega_{ge(t')} > 0$  for non-causal tissues at  $p < 0.05$ . (B)  
 1081 Power to detect the causal tissue, in which  $\omega_{ge(t')} > 0$  for causal tissues at  $p < 0.05$ . (C)  
 1082 Bias on estimates of causal and non-causal  $\omega_{ge(t')}$  whose true values are 0.05 (purple bars) and  
 1083 0 (gray bars), respectively, in the scenario of using bias correction applied to all correlations of  
 1084 predicted gene expression in co-regulation scores. In all panels, we performed  $n = 1,000$   
 1085 independent simulated genetic architectures across different eQTL sample sizes ( $n = 100, 200,$   
 1086  $300, 500, 1000, 1500$ ); we used a one-sided z-test and the genomic block jackknife standard  
 1087 error to obtain p-values and data are presented as mean values  $\pm 1.96 \times \text{SEM}$ . The value of  $G_{t'}$   
 1088 is set to the total number of unique *cis*-heritable genes across all tissues.

1089

1090

1091

1092

1093

1094

1095

1096

1097

1098

1099

1100

1101

1102

1103

1104

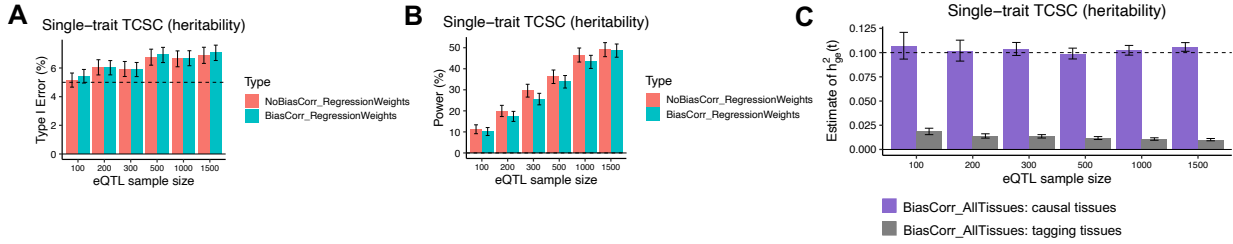

1105

1106 **Supplementary Figure 10. Robustness and power of TCSC regression without (default) or with**  
 1107 **bias correction for tissue co-regulation scores used to calculate regression weights in**  
 1108 **simulations.** (A) Type I error for each of two scenarios: (1) “NoBiasCorr\_RegressionWeights”:  
 1109 regression weights calculated using uncorrected tissue co-regulation scores as in primary  
 1110 simulations (pink) vs (2) “BiasCorr\_RegressionWeights”: regression weights calculated using  
 1111 bias-corrected tissue co-regulation scores (green). False positive event defined as  $h_{ge(tr)}^2 > 0$   
 1112 non-causal tissues at  $p < 0.05$ . (B) Power to detect the causal tissue, in which  $h_{ge(tr)}^2 > 0$   
 1113 causal tissues at  $p < 0.05$ . (C) Bias on estimates of causal and non-causal  $h_{ge(tr)}^2$  whose true  
 1114 values are 0.1 (purple bars) and 0 (gray bars), respectively, in the scenario of calculating  
 1115 regression weights using bias-corrected tissue co-regulation scores. In all panels, we performed  
 1116  $n = 1,000$  independent simulated genetic architectures across different eQTL sample sizes ( $n =$   
 1117 100, 200, 300, 500, 1000, 1500); we used a one-sided z-test and the genomic block jackknife  
 1118 standard error to obtain p-values and data are presented as mean values  $\pm 1.96 \times \text{SEM}$ . The  
 1119 value of  $G_t$  is set to the total number of unique *cis*-heritable genes across all tissues.

1120

1121

1122

1123

1124

1125

1126

1127

1128

1129

1130

1131

1132

1133

1134

1135

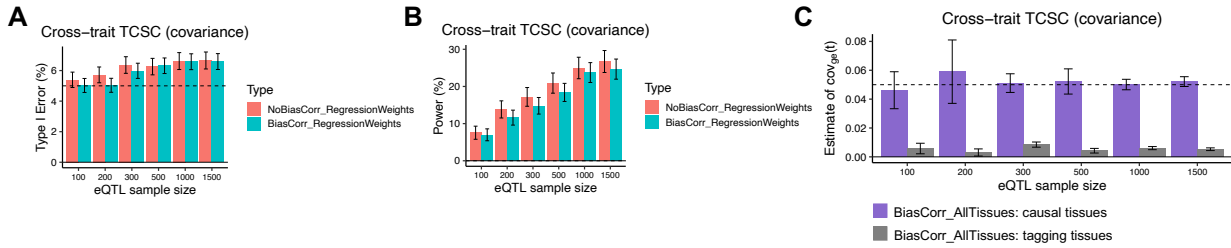

1136

1137 **Supplementary Figure 11. Robustness and power of cross-trait TCSC regression with or**  
 1138 **without correction for bias in tissue co-regulation scores in simulations.** (A) Type I error for  
 1139 each of two scenarios: (1) “NoBiasCorr\_RegressionWeights”: regression weights calculated  
 1140 using uncorrected tissue co-regulation scores as in primary simulations (pink) vs (2)  
 1141 “BiasCorr\_RegressionWeights”: regression weights calculated using bias-corrected tissue co-  
 1142 regulation scores (green). False positive event defined as  $\omega_{ge(t)} > 0$  for non-causal tissues at  $p$   
 1143  $< 0.05$ . (B) Power to detect the causal tissue, in which  $\omega_{ge(t)} > 0$  for causal tissues at  $p < 0.05$ .  
 1144 (C) Bias on estimates of causal and non-causal  $\omega_{ge(t)}$  whose true values are 0.05 (purple bars)  
 1145 and 0 (gray bars), respectively, in the scenario of calculating regression weights using bias-  
 1146 corrected tissue co-regulation scores. In all panels, we performed  $n = 1,000$  independent  
 1147 simulated genetic architectures across different eQTL sample sizes ( $n = 100, 200, 300, 500,$   
 1148  $1000, 1500$ ); we used a one-sided z-test and the genomic block jackknife standard error to  
 1149 obtain p-values and data are presented as mean values  $\pm 1.96 \times \text{SEM}$ . The value of  $G_{t_i}$  is set to  
 1150 the total number of unique *cis*-heritable genes across all tissues.

1151

1152

1153

1154

1155

1156

1157

1158

1159

1160



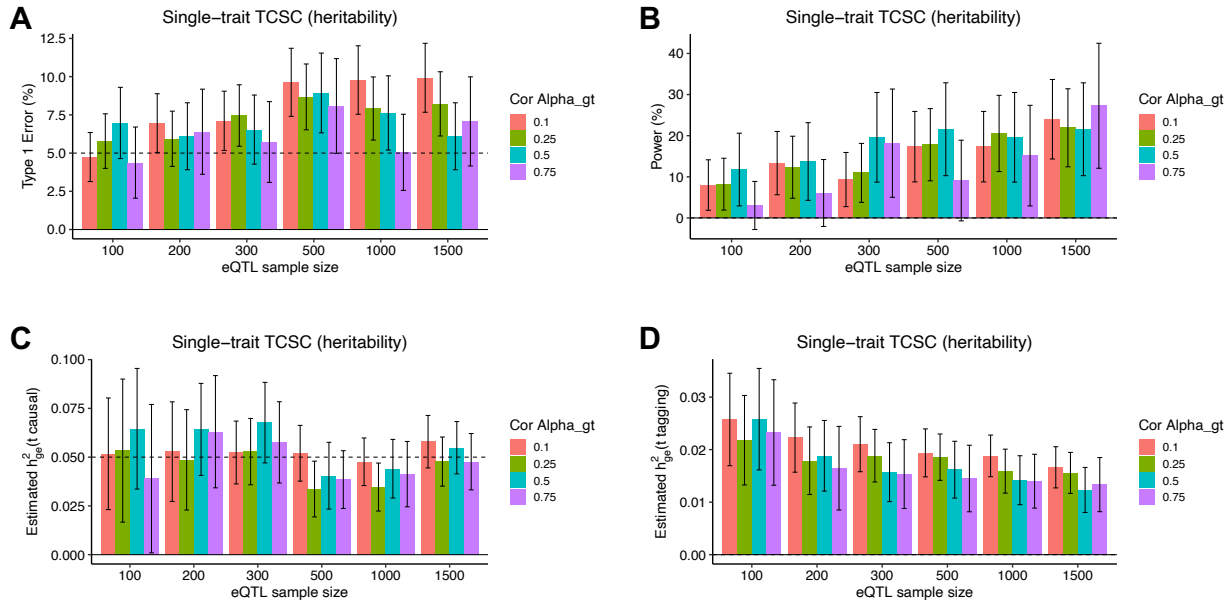

1161  
 1162  
 1163  
 1164  
 1165  
 1166  
 1167  
 1168  
 1169  
 1170  
 1171  
 1172  
 1173  
 1174  
 1175  
 1176  
 1177  
 1178

**Supplementary Figure 12. Robustness of cross-trait TCSC regression in simulations with two causal tissues with varying levels of correlated gene expression-trait effects.** We demonstrate how TCSC would behave when there are two causal tissues with correlation gene-trait effects ( $\alpha_{gt}$ ), each tissue of which contributes 5% heritability to the trait. This is a model violation where TCSC assumes that gene expression-trait effects are i.i.d. (A) Type I error while varying the correlation between the  $\alpha_{gt}$  of each causal tissue. False positive event defined as  $h^2_{ge(tr)} > 0$  for non-causal tissues at  $p < 0.05$ . (B) Power to detect the causal tissues in which  $h^2_{ge(tr)} > 0$  for causal tissues at  $p < 0.05$ . (C) Bias on estimates of  $h^2_{ge(tr)}$  for the causal tissue, while varying the correlation between the  $\alpha_{gt}$  of each causal tissue. The dashed line indicates that the true value of  $h^2_{ge(tr)}$  for either causal tissue. (D) Bias on estimates of  $h^2_{ge(tr)}$  for non-causal tissues, while varying the correlation between the  $\alpha_{gt}$  of each causal tissue. In all panels, we performed  $n = 1,000$  independent simulated genetic architectures across different eQTL sample sizes ( $n = 100, 200, 300, 500, 1000, 1500$ ); we used a one-sided z-test and the genomic block jackknife standard error to obtain p-values and data are presented as mean values  $\pm 1.96 \times \text{SEM}$ . The value of  $G_t$  is set to the total number of unique *cis*-heritable genes across all tissues.

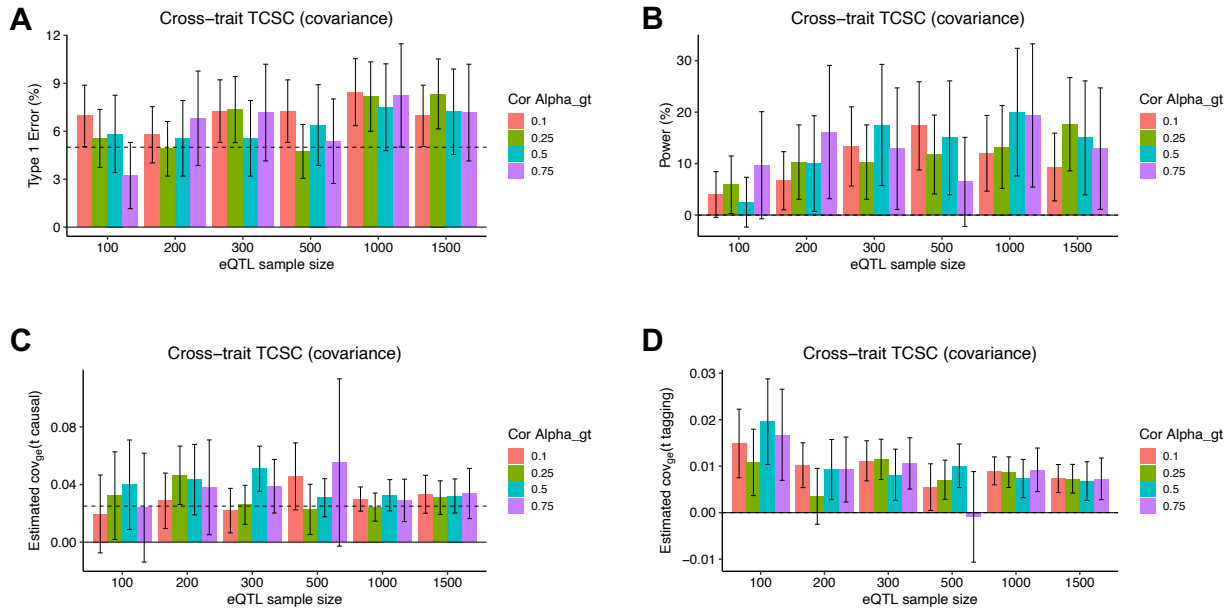

1179  
1180

1181 **Supplementary Figure 13. Robustness of cross-trait TCSC regression in simulations with two**  
 1182 **causal tissues with varying levels of correlated gene expression-trait effects.** We demonstrate  
 1183 how TCSC would behave when there are two causal tissues with correlation gene-trait effects  
 1184 ( $\alpha_{gt}$ ), each tissue of which contributes 5% heritability to the trait. This is a model violation  
 1185 where TCSC assumes that gene expression-trait effects are i.i.d. (A) Type I error while varying  
 1186 the correlation between the  $\alpha_{gt}$  of each causal tissue. False positive event defined as  $\omega_{ge(tr)} > 0$   
 1187 for non-causal tissues at  $p < 0.05$ . (B) Power to detect the causal tissues in which  $\omega_{ge(tr)} > 0$   
 1188 for causal tissues at  $p < 0.05$ . (C) Bias on estimates of  $\omega_{ge(tr)}$  for the causal tissue, while varying the  
 1189 correlation between the  $\alpha_{gt}$  of each causal tissue. The dashed line indicates that the true value  
 1190 of  $\omega_{ge(tr)}$  for either causal tissue. (D) Bias on estimates of  $\omega_{ge(tr)}$  for non-causal tissues, while  
 1191 varying the correlation between the  $\alpha_{gt}$  of each causal tissue. In all panels, we performed  $n =$   
 1192 1,000 independent simulated genetic architectures across different eQTL sample sizes ( $n = 100,$   
 1193 200, 300, 500, 1000, 1500); we used a one-sided z-test and the genomic block jackknife  
 1194 standard error to obtain p-values and data are presented as mean values  $\pm 1.96 \times \text{SEM}$ . The  
 1195 value of  $G_{tr}$  is set to the total number of unique *cis*-heritable genes across all tissues.

1196  
1197  
1198  
1199  
1200  
1201  
1202  
1203  
1204  
1205  
1206

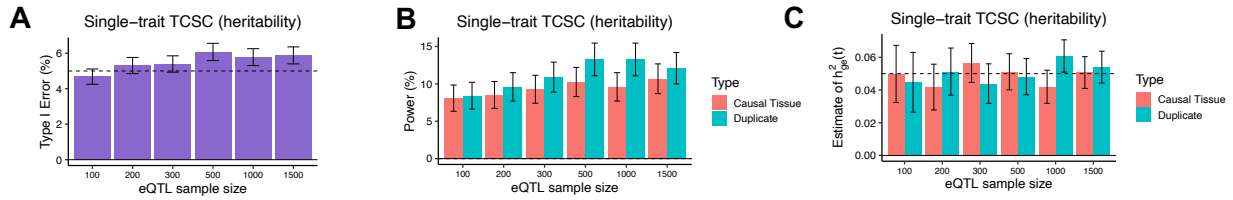

1207  
1208  
1209  
1210  
1211  
1212  
1213  
1214  
1215  
1216  
1217  
1218  
1219  
1220  
1221  
1222  
1223  
1224  
1225  
1226  
1227  
1228  
1229  
1230  
1231  
1232  
1233  
1234  
1235  
1236  
1237  
1238  
1239  
1240  
1241

**Supplementary Figure 14. Robustness of single-trait TCSC regression in simulations with two causal tissues with identical gene expression-trait effects.** We demonstrate how TCSC would behave when there are two identical tissues contributing the same genetic component of gene expression to the trait. This is a model violation where TCSC assumes that gene expression-trait effects are i.i.d. To the original and duplicated causal tissue, we added a small amount of noise (with mean 0, variance 0.0025) to the tissue co-regulation scores of each duplicated tissue to avoid collinearity in the multiple linear regression. (A) Type I error; false positive event defined as  $h^2_{ge(tr)} > 0$  for non-causal tissues at  $p < 0.05$ . (B) Power to detect each of two causal tissues, e.g.  $h^2_{ge(tr)} > 0$  for the causal tissue at  $p < 0.05$ . (C) TCSC estimates similar values of  $h^2_{ge(tr)}$  to each causal tissue, approximately one-half the value of the trait variance explained by the original causal tissue (0.1). Dashed line at 0.05, the expected tissue-specific contribution to heritability for both original and duplicated tissue. In all panels, we performed  $n = 1,000$  independent simulated genetic architectures across different eQTL sample sizes ( $n = 100, 200, 300, 500, 1000, 1500$ ); we used a one-sided z-test and the genomic block jackknife standard error to obtain p-values and data are presented as mean values  $\pm 1.96 \times \text{SEM}$ . The value of  $G_{tr}$  is set to the total number of unique *cis*-heritable genes across all tissues.

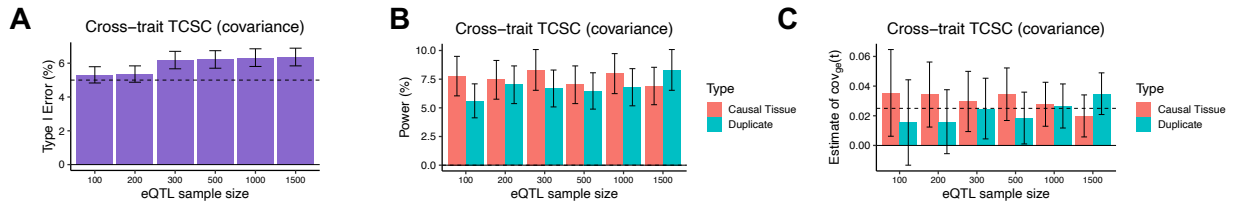

1242  
1243  
1244  
1245  
1246  
1247  
1248  
1249  
1250  
1251  
1252  
1253  
1254  
1255  
1256  
1257  
1258  
1259  
1260  
1261  
1262  
1263  
1264  
1265  
1266  
1267  
1268  
1269  
1270

**Supplementary Figure 15. Robustness of cross-trait TCSC regression in simulations with two causal tissues with identical gene expression-trait effects.** We demonstrate how TCSC would behave when there are two identical tissues contributing the same genetic component of gene expression to the trait. This is a model violation where TCSC assumes that gene expression-trait effects are i.i.d. To the original and duplicated causal tissue, we added a small amount of noise (with mean 0, variance 0.0025) to the tissue co-regulation scores of each duplicated tissue to avoid collinearity in the multiple linear regression. (A) Type I error; false positive event defined as  $\omega_{ge(tr)} > 0$  for non-causal tissues at  $p < 0.05$ . (B) Power to detect each of two causal tissues, e.g.  $\omega_{ge(tr)} > 0$  for the causal tissue at  $p < 0.05$ . (C) TCSC estimates similar values of  $\omega_{ge(tr)}$  to each causal tissue, approximately one-half the value of the trait covariance explained by the original causal tissue (0.05). Dashed line at 0.025, the expected tissue-specific contribution to covariance for both original and duplicated tissue. In all panels, we performed  $n = 1,000$  independent simulated genetic architectures across different eQTL sample sizes ( $n = 100, 200, 300, 500, 1000, 1500$ ); we used a one-sided z-test and the genomic block jackknife standard error to obtain p-values and data are presented as mean values  $\pm 1.96 \times \text{SEM}$ . The value of  $G_{tr}$  is set to the total number of unique *cis*-heritable genes across all tissues.

1271

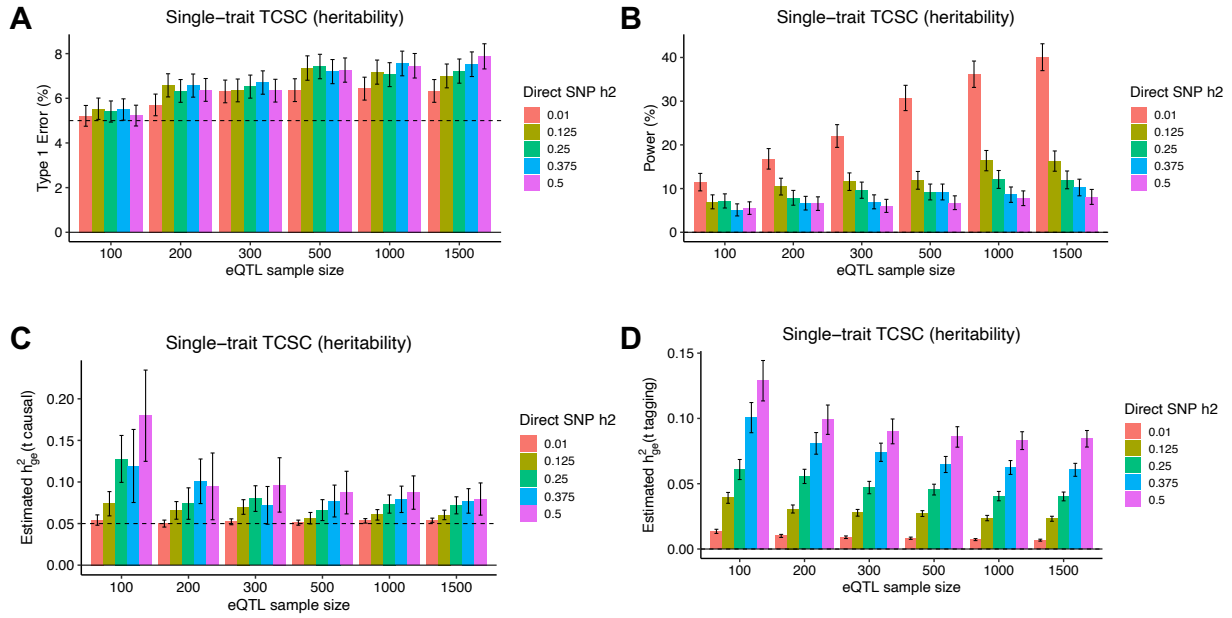

1272

1273 **Supplementary Figure 16. Robustness and power of TCSC regression in simulations with**  
 1274 **different amounts of direct SNP-trait heritability ( $h_{SNP}^2$ ) not mediated by gene expression.** (A)  
 1275 Type I error per value of  $h_{SNP}^2$ . False positive event is defined as  $h_{ge}^2 > 0$  for non-causal  
 1276 tissues at  $p < 0.05$ . (B) Power to detect the causal tissue per value of  $h_{SNP}^2$ . A true positive event  
 1277 is defined as  $h_{ge}^2 > 0$  for causal tissues at  $p < 0.05$ . (C) Bias on causal estimates of  $h_{ge}^2$  for  
 1278 different values of  $h_{SNP}^2$ . Dashed line indicates true value of  $h_{ge}^2$ . (D) Bias on non-causal  
 1279 estimates of  $h_{ge}^2$  for different values of  $h_{SNP}^2$ . In all panels, we performed  $n = 1,000$   
 1280 independent simulated genetic architectures across different eQTL sample sizes ( $n = 100, 200,$   
 1281  $300, 500, 1000, 1500$ ); we used a one-sided z-test and the genomic block jackknife standard  
 1282 error to obtain p-values and data are presented as mean values  $\pm 1.96 \times \text{SEM}$ . The value of  $G_{t_r}$   
 1283 is set to the total number of unique *cis*-heritable genes across all tissues.

1284

1285

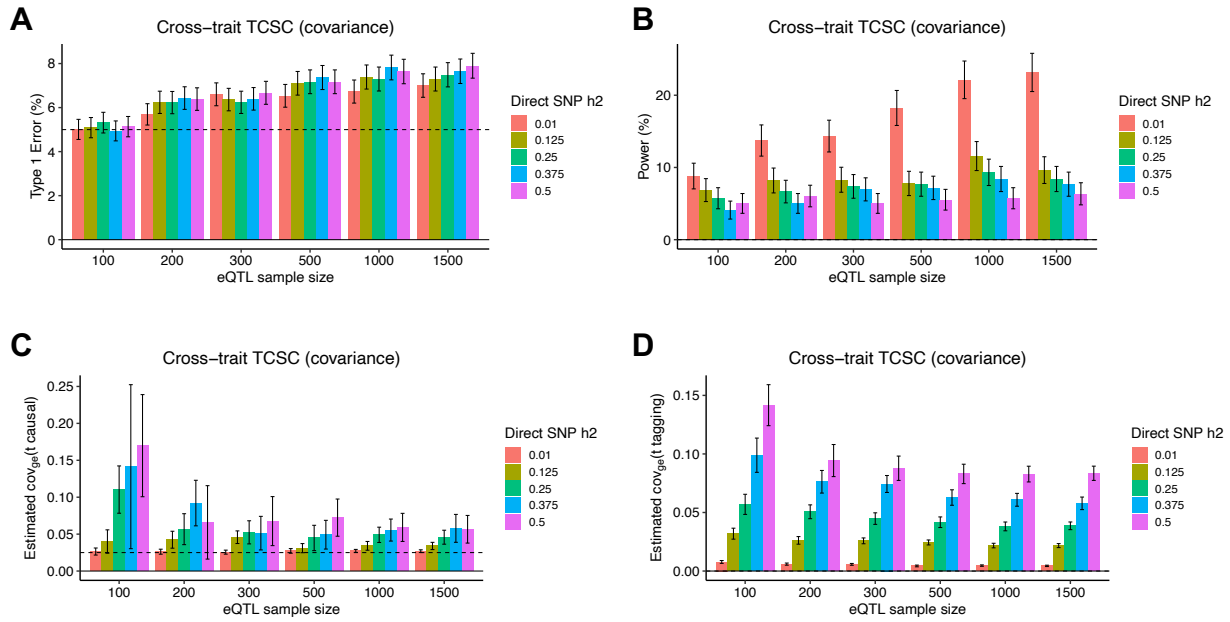

1286

1287 **Supplementary Figure 17. Robustness and power of cross-trait TCSC regression in simulations**  
 1288 **with different amounts of direct SNP-trait heritability ( $h_{SNP}^2$ ) not mediated by gene**

1289 **expression.** (A) Type I error per value of  $h_{SNP}^2$ . False positive event is defined as  $\omega_{ge(t)} > 0$  for  
 1290 non-causal tissues at  $p < 0.05$ . (B) Power to detect the causal tissue per value of  $h_{SNP}^2$ . A true  
 1291 positive event is defined as  $\omega_{ge(t)} > 0$  for causal tissues at  $p < 0.05$ . (C) Bias on causal estimates  
 1292 of  $\omega_{ge(t)}$  for different values of  $h_{SNP}^2$ . Dashed line indicates true value of  $\omega_{ge(t)}$ . (D) Bias on  
 1293 non-causal estimates of  $\omega_{ge(t)}$  for different values of  $h_{SNP}^2$ . In all panels, we performed  $n =$   
 1294 1,000 independent simulated genetic architectures across different eQTL sample sizes ( $n = 100,$   
 1295 200, 300, 500, 1000, 1500); we used a one-sided z-test and the genomic block jackknife  
 1296 standard error to obtain p-values and data are presented as mean values  $\pm 1.96 \times \text{SEM}$ . The  
 1297 value of  $G_t$ , is set to the total number of unique *cis*-heritable genes across all tissues.

1298

1299

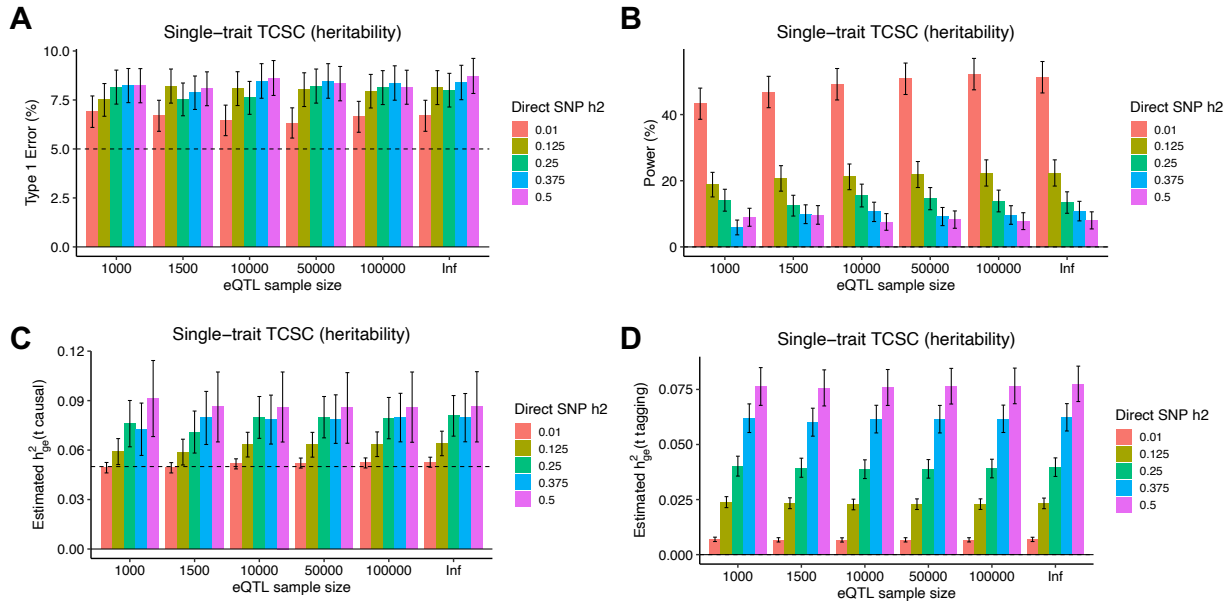

1300

1301 **Supplementary Figure 18. Robustness and power of TCSC regression in simulations with**  
 1302 **different amounts of direct SNP-trait heritability ( $h_{SNP}^2$ ) not mediated by gene expression at**  
 1303 **large eQTL sample size. (A) Type I error per value of  $h_{SNP}^2$ . False positive event is defined as**  
 1304  **$h_{ge(tr)}^2 > 0$  for non-causal tissues at  $p < 0.05$ . (B) Power to detect the causal tissue per value of**  
 1305  **$h_{SNP}^2$ . A true positive event is defined as  $h_{ge(tr)}^2 > 0$  for causal tissues at  $p < 0.05$ . (C) Bias on**  
 1306 **causal estimates of  $h_{ge(tr)}^2$  for different values of  $h_{SNP}^2$ . Dashed line indicates true value of**  
 1307  **$h_{ge(tr)}^2$ . (D) Bias on non-causal estimates of  $h_{ge(tr)}^2$  for different values of  $h_{SNP}^2$ . In all panels, we**  
 1308 **performed  $n = 1,000$  independent simulated genetic architectures across different eQTL sample**  
 1309 **sizes ( $n = 1000, 1500, 10K, 50K, 100K, Infinite$  (true eQTL effects)); we used a one-sided z-test**  
 1310 **and the genomic block jackknife standard error to obtain p-values and data are presented as**  
 1311 **mean values  $\pm 1.96 \times SEM$ . The value of  $G_{tr}$  is set to the total number of unique *cis*-heritable**  
 1312 **genes across all tissues. For these simulations, significantly *cis*-heritable genes were determined**  
 1313 **using cross-validation adjusted- $R^2 > 0$  rather than GCTA  $p < 0.01$ , due to the computationally**  
 1314 **intensive nature of running GCTA on hundreds of thousands of samples across thousands of**  
 1315 **simulations.**  
 1316

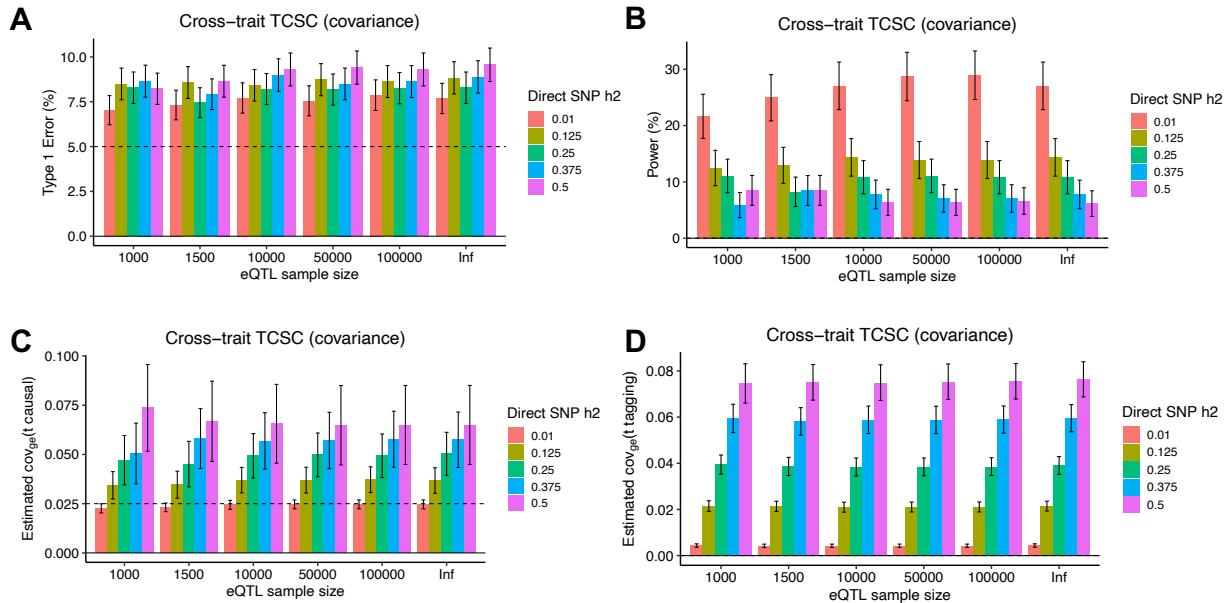

1317

1318 **Supplementary Figure 19. Robustness and power of cross-trait TCSC regression in simulations**  
 1319 **with different amounts of direct SNP-trait heritability ( $h_{SNP}^2$ ) not mediated by gene**

1320 **expression at large eQTL sample size. (A) Type I error per value of  $h_{SNP}^2$ . False positive event is**  
 1321 **defined as  $\omega_{ge(tr)} > 0$  for non-causal tissues at  $p < 0.05$ . (B) Power to detect the causal tissue**  
 1322 **per value of  $h_{SNP}^2$ . A true positive event is defined as  $\omega_{ge(tr)} > 0$  for causal tissues at  $p < 0.05$ . (C)**

1323 **Bias on causal estimates of  $\omega_{ge(tr)}$  for different values of  $h_{SNP}^2$ . Dashed line indicates true value**  
 1324 **of  $\omega_{ge(tr)}$ . (D) Bias on non-causal estimates of  $\omega_{ge(tr)}$  for different values of  $h_{SNP}^2$ . In all panels,**

1325 **we performed  $n = 1,000$  independent simulated genetic architectures across different eQTL**  
 1326 **sample sizes ( $n = 1000, 1500, 10K, 50K, 100K, \text{Infinite (true eQTL effects)}$ ); we used a one-sided**  
 1327 **z-test and the genomic block jackknife standard error to obtain p-values and data are presented**  
 1328 **as mean values  $\pm 1.96 \times \text{SEM}$ . The value of  $G_t$ , is set to the total number of unique *cis*-**  
 1329 **heritable genes across all tissues. For these simulations, significantly *cis*-heritable genes were**  
 1330 **determined using cross-validation adjusted- $R^2 > 0$  rather than GCTA  $p < 0.01$ , due to the**  
 1331 **computationally intensive nature of running GCTA on hundreds of thousands of samples across**  
 1332 **thousands of simulations.**

1333

1334

1335



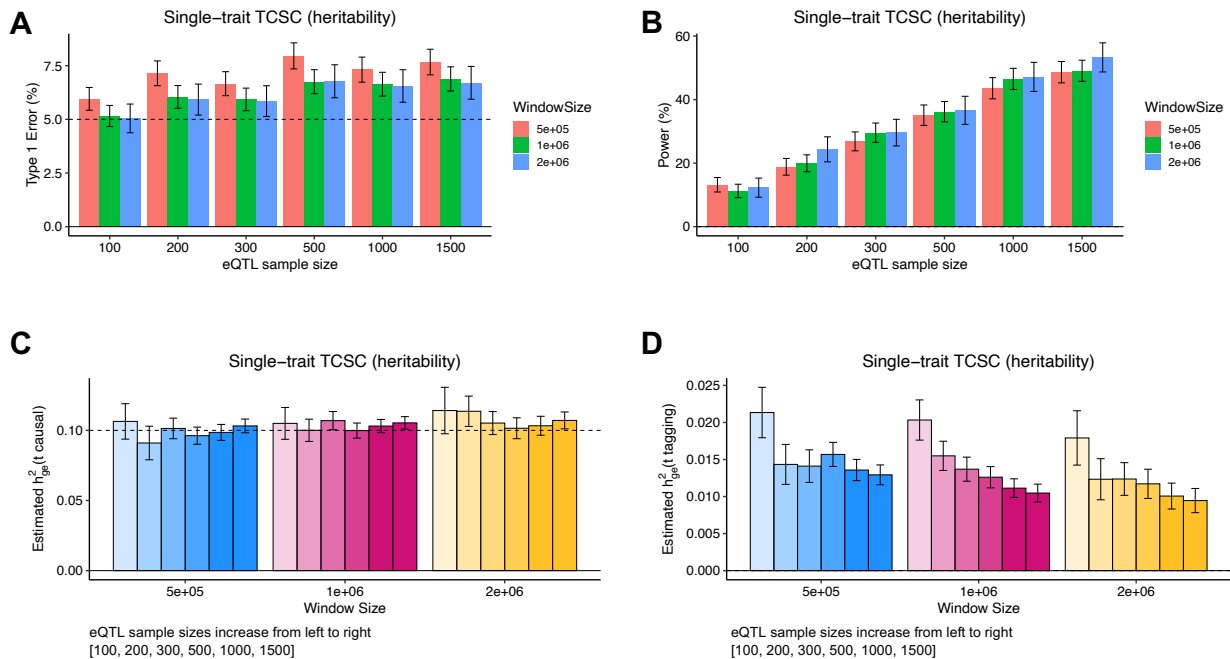

1336

1337 **Supplementary Figure 20. Robustness and power of TCSC regression in simulations with**  
 1338 **different values of window size used to calculate gene-gene co-regulation.** (A) Type I error per  
 1339 window size. False positive event is defined as  $h^2_{ge(tr)} > 0$  for non-causal tissues at  $p < 0.05$ . (B)  
 1340 Power to detect the causal tissue per window size. A true positive event is defined as  $h^2_{ge(tr)} > 0$   
 1341 for causal tissues at  $p < 0.05$ . (C) Bias on causal estimates of  $h^2_{ge(tr)}$  for different window sizes.  
 1342 Dashed lines indicate true values of  $h^2_{ge(tr)}$ . (D) Bias on non-causal estimates of  $h^2_{ge(tr)}$  for  
 1343 different window sizes. In all panels, we performed  $n = 1,000$  independent simulated genetic  
 1344 architectures across different eQTL sample sizes ( $n = 100, 200, 300, 500, 1000, 1500$ ); we used a  
 1345 one-sided z-test and the genomic block jackknife standard error to obtain p-values and data are  
 1346 presented as mean values  $\pm 1.96 \times \text{SEM}$ . The value of  $G_{tr}$  is set to the total number of unique  
 1347 *cis*-heritable genes across all tissues.  
 1348

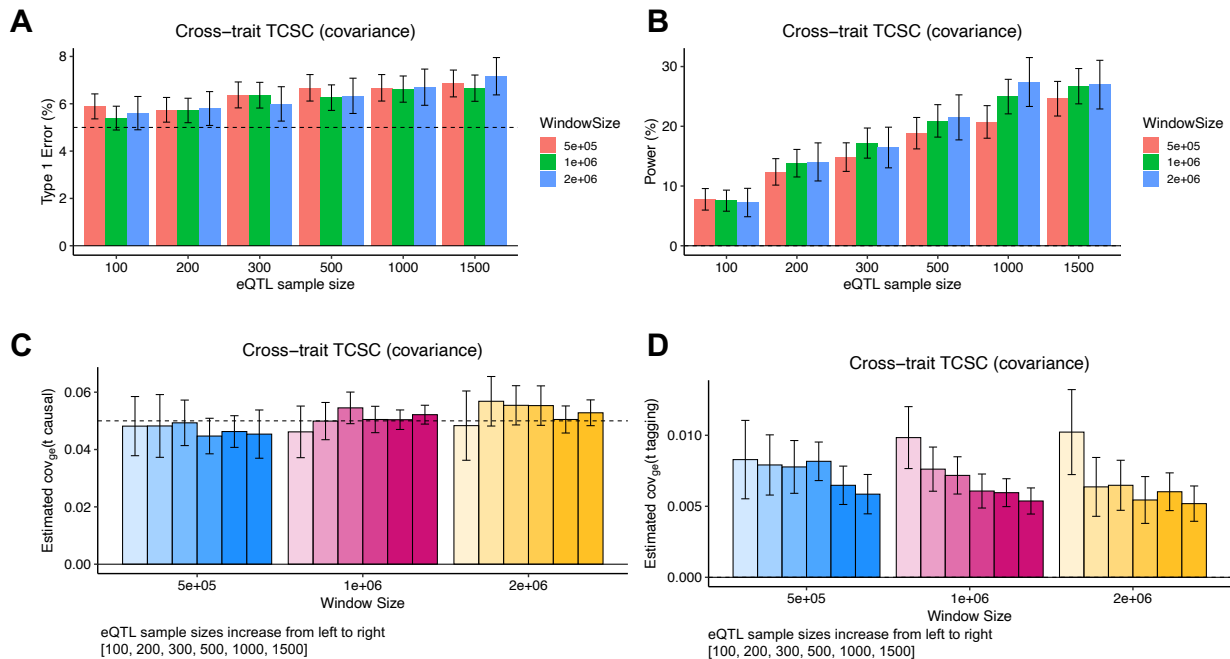

1349

1350 **Supplementary Figure 21. Robustness and power of cross-trait TCSC regression in simulations**  
 1351 **with different values of window size used to calculate gene-gene co-regulation.** (A) Type I  
 1352 error per window size. False positive event is defined as  $\omega_{ge(tr)} > 0$  for non-causal tissues at  $p <$   
 1353  $0.05$ . (B) Power to detect the causal tissue per window size. A true positive event is defined as  
 1354  $\omega_{ge(tr)} > 0$  for causal tissues at  $p < 0.05$ . (C) Bias on causal estimates of  $\omega_{ge(tr)}$  for different  
 1355 window sizes. Dashed lines indicate true values of  $\omega_{ge(tr)}$ . (D) Bias on non-causal estimates of  
 1356  $\omega_{ge(tr)}$  for different window sizes. In all panels, we performed  $n = 1,000$  independent simulated  
 1357 genetic architectures across different eQTL sample sizes ( $n = 100, 200, 300, 500, 1000, 1500$ );  
 1358 we used a one-sided z-test and the genomic block jackknife standard error to obtain p-values  
 1359 and data are presented as mean values  $\pm 1.96 \times \text{SEM}$ . The value of  $G_{tr}$  is set to the total  
 1360 number of unique *cis*-heritable genes across all tissues.

1361

1362

1363

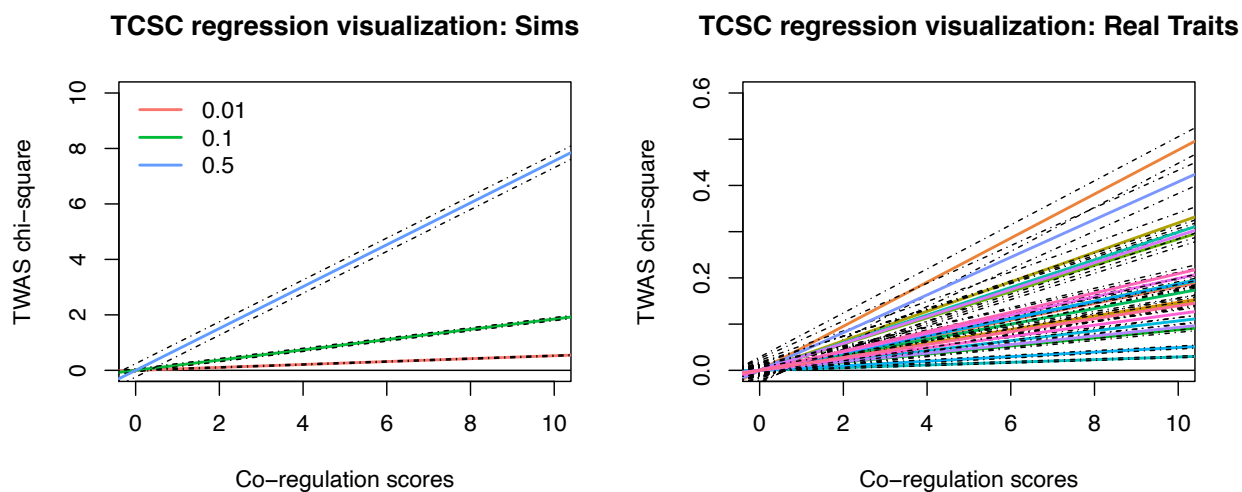

1364  
 1365 **Supplementary Figure 22. Visualization of TCSC regression.** (A) In simulations, we visualize the  
 1366 single-trait TCSC estimand ( $h_{ge(t)}^2$ ) as the line of best fit (slope) for one representative  
 1367 simulation from each of three true values of  $h_{ge(t)}^2$  using an intercept of 0. (B) In analysis of real  
 1368 traits, we visualize the single-trait TCSC estimand ( $h_{ge(t)}^2$ ) as the line of best fit (slope) for each  
 1369 of 21 significant tissue-trait pairs using an intercept of 0. In panels A and B, solid lines represent  
 1370 the TCSC estimate; dashed lines represent the estimate +/- 1.96 x the jackknife standard error.  
 1371 All slopes shown are significantly greater than zero at 5% FDR.  
 1372  
 1373

1374 **Supplementary references**

1375

- 1376 1. Ongen, H. *et al.* Estimating the causal tissues for complex traits and diseases. *Nat Genet*  
1377 **49**, 1676-1683 (2017).
- 1378 2. Finucane, H.K. *et al.* Heritability enrichment of specifically expressed genes identifies  
1379 disease-relevant tissues and cell types. *Nat Genet* **50**, 621-629 (2018).
- 1380 3. Gazal, S. *et al.* Combining SNP-to-gene linking strategies to identify disease genes and  
1381 assess disease omnigenicity. *Nat Genet* **54**, 827-836 (2022).
- 1382 4. Liu, X. *et al.* Functional Architectures of Local and Distal Regulation of Gene Expression  
1383 in Multiple Human Tissues. *Am J Hum Genet* **100**, 605-616 (2017).
- 1384 5. Consortium, G.T. The GTEx Consortium atlas of genetic regulatory effects across human  
1385 tissues. *Science* **369**, 1318-1330 (2020).
- 1386 6. Yazar, S. *et al.* Single-cell eQTL mapping identifies cell type-specific genetic control of  
1387 autoimmune disease. *Science* **376**, eabf3041 (2022).
- 1388 7. Li, Z. *et al.* METRO: Multi-ancestry transcriptome-wide association studies for powerful  
1389 gene-trait association detection. *Am J Hum Genet* **109**, 783-801 (2022).
- 1390 8. Siewert-Rocks, K.M., Kim, S.S., Yao, D.W., Shi, H. & Price, A.L. Leveraging gene co-  
1391 regulation to identify gene sets enriched for disease heritability. *Am J Hum Genet* **109**, 393-404  
1392 (2022).
- 1393 9. Yang, J., Lee, S.H., Goddard, M.E. & Visscher, P.M. GCTA: a tool for genome-wide  
1394 complex trait analysis. *Am J Hum Genet* **88**, 76-82 (2011).
- 1395 10. Gusev, A. *et al.* Integrative approaches for large-scale transcriptome-wide association  
1396 studies. *Nat Genet* **48**, 245-52 (2016).
- 1397 11. Calderon, D. *et al.* Inferring Relevant Cell Types for Complex Traits by Using Single-Cell  
1398 Gene Expression. *Am J Hum Genet* **101**, 686-699 (2017).
- 1399 12. Shang, L., Smith, J.A. & Zhou, X. Leveraging gene co-expression patterns to infer trait-  
1400 relevant tissues in genome-wide association studies. *PLoS Genet* **16**, e1008734 (2020).
- 1401 13. Amariuta, T. TCSC GitHub Repository. (2023).
- 1402 14. Frederiksen, L. *et al.* Subcutaneous rather than visceral adipose tissue is associated with  
1403 adiponectin levels and insulin resistance in young men. *J Clin Endocrinol Metab* **94**, 4010-5  
1404 (2009).
- 1405 15. McGillicuddy, F.C., Reilly, M.P. & Rader, D.J. Adipose modulation of high-density  
1406 lipoprotein cholesterol: implications for obesity, high-density lipoprotein metabolism, and  
1407 cardiovascular disease. *Circulation* **124**, 1602-5 (2011).
- 1408 16. Hung, K.T., Berisha, S.Z., Ritchey, B.M., Santore, J. & Smith, J.D. Red blood cells play a  
1409 role in reverse cholesterol transport. *Arterioscler Thromb Vasc Biol* **32**, 1460-5 (2012).
- 1410 17. Finucane, H.K. *et al.* Partitioning heritability by functional annotation using genome-  
1411 wide association summary statistics. *Nat Genet* **47**, 1228-35 (2015).
- 1412 18. Timshel, P.N., Thompson, J.J. & Pers, T.H. Genetic mapping of etiologic brain cell types  
1413 for obesity. *Elife* **9**(2020).
- 1414 19. Zhu, J.N. & Wang, J.J. The cerebellum in feeding control: possible function and  
1415 mechanism. *Cell Mol Neurobiol* **28**, 469-78 (2008).
- 1416 20. Onat, F. & Cavdar, S. Cerebellar connections: hypothalamus. *Cerebellum* **2**, 263-9 (2003).

- 1417 21. Low, A.Y.T. *et al.* Reverse-translational identification of a cerebellar satiation network.  
1418 *Nature* **600**, 269-273 (2021).
- 1419 22. Bruning, J.C. *et al.* Role of brain insulin receptor in control of body weight and  
1420 reproduction. *Science* **289**, 2122-5 (2000).
- 1421 23. Fontana, R. & Della Torre, S. The Deep Correlation between Energy Metabolism and  
1422 Reproduction: A View on the Effects of Nutrition for Women Fertility. *Nutrients* **8**, 87 (2016).
- 1423 24. Kendall, R.T. & Feghali-Bostwick, C.A. Fibroblasts in fibrosis: novel roles and mediators.  
1424 *Front Pharmacol* **5**, 123 (2014).
- 1425 25. Felger, J.C. & Lotrich, F.E. Inflammatory cytokines in depression: neurobiological  
1426 mechanisms and therapeutic implications. *Neuroscience* **246**, 199-229 (2013).
- 1427 26. Soler Artigas, M. *et al.* Sixteen new lung function signals identified through 1000  
1428 Genomes Project reference panel imputation. *Nat Commun* **6**, 8658 (2015).
- 1429 27. Chung, K.F. The role of airway smooth muscle in the pathogenesis of airway wall  
1430 remodeling in chronic obstructive pulmonary disease. *Proc Am Thorac Soc* **2**, 347-54; discussion  
1431 371-2 (2005).
- 1432 28. Farooqi, I.S. Defining the neural basis of appetite and obesity: from genes to behaviour.  
1433 *Clin Med (Lond)* **14**, 286-9 (2014).
- 1434 29. Locke, A.E. *et al.* Genetic studies of body mass index yield new insights for obesity  
1435 biology. *Nature* **518**, 197-206 (2015).
- 1436 30. Medic, N. *et al.* Increased body mass index is associated with specific regional  
1437 alterations in brain structure. *Int J Obes (Lond)* **40**, 1177-82 (2016).
- 1438 31. Yengo, L. *et al.* Meta-analysis of genome-wide association studies for height and body  
1439 mass index in approximately 700000 individuals of European ancestry. *Hum Mol Genet* **27**,  
1440 3641-3649 (2018).
- 1441 32. Kniewallner, K.M., Ehrlich, D., Kiefer, A., Marksteiner, J. & Humpel, C. Platelets in the  
1442 Alzheimer's disease brain: do they play a role in cerebral amyloid angiopathy? *Curr Neurovasc*  
1443 *Res* **12**, 4-14 (2015).
- 1444 33. Kucheryavykh, L.Y. *et al.* Platelets are responsible for the accumulation of beta-amyloid  
1445 in blood clots inside and around blood vessels in mouse brain after thrombosis. *Brain Res Bull*  
1446 **128**, 98-105 (2017).
- 1447 34. Leiter, O. & Walker, T.L. Platelets: The missing link between the blood and brain? *Prog*  
1448 *Neurobiol* **183**, 101695 (2019).
- 1449 35. Aminian, A. *et al.* Significance of platelet count in esophageal carcinomas. *Saudi J*  
1450 *Gastroenterol* **17**, 134-7 (2011).
- 1451 36. Burkhardt, M.A. *et al.* Synergistic interactions of blood-borne immune cells, fibroblasts  
1452 and extracellular matrix drive repair in an in vitro peri-implant wound healing model. *Sci Rep* **6**,  
1453 21071 (2016).
- 1454 37. Grant, S.G., Melan, M.A., Latimer, J.J. & Witt-Enderby, P.A. Melatonin and breast cancer:  
1455 cellular mechanisms, clinical studies and future perspectives. *Expert Rev Mol Med* **11**, e5 (2009).
- 1456 38. Coffey, R.J., Jr. *et al.* Production and auto-induction of transforming growth factor-alpha  
1457 in human keratinocytes. *Nature* **328**, 817-20 (1987).
- 1458 39. Bartell, E. *et al.* Protein QTL analysis of IGF-I and its binding proteins provides insights  
1459 into growth biology. *Hum Mol Genet* **29**, 2625-2636 (2020).

- 1460 40. Fredriksson, K. *et al.* Red blood cells stimulate human lung fibroblasts to secrete  
1461 interleukin-8. *Inflammation* **27**, 71-8 (2003).
- 1462 41. Fredriksson, K. *et al.* Red blood cells increase secretion of matrix metalloproteinases  
1463 from human lung fibroblasts in vitro. *Am J Physiol Lung Cell Mol Physiol* **290**, L326-33 (2006).
- 1464 42. Gomes, I. *et al.* Eosinophil-fibroblast interactions induce fibroblast IL-6 secretion and  
1465 extracellular matrix gene expression: implications in fibrogenesis. *J Allergy Clin Immunol* **116**,  
1466 796-804 (2005).
- 1467 43. Schroder, T., Fuchss, J., Schneider, I., Stoltenburg-Didinger, G. & Hanisch, F. Eosinophils  
1468 in hereditary and inflammatory myopathies. *Acta Myol* **32**, 148-53 (2013).
- 1469 44. Herbst, K.L. & Bhasin, S. Testosterone action on skeletal muscle. *Curr Opin Clin Nutr*  
1470 *Metab Care* **7**, 271-7 (2004).
- 1471 45. Atkinson, R.A. *et al.* Effects of testosterone on skeletal muscle architecture in  
1472 intermediate-frail and frail elderly men. *J Gerontol A Biol Sci Med Sci* **65**, 1215-9 (2010).
- 1473 46. Plessen, K.J. *et al.* Hippocampus and amygdala morphology in attention-  
1474 deficit/hyperactivity disorder. *Arch Gen Psychiatry* **63**, 795-807 (2006).
- 1475 47. Demontis, D. *et al.* Discovery of the first genome-wide significant risk loci for attention  
1476 deficit/hyperactivity disorder. *Nat Genet* **51**, 63-75 (2019).
- 1477 48. Enard, W. *et al.* A humanized version of Foxp2 affects cortico-basal ganglia circuits in  
1478 mice. *Cell* **137**, 961-71 (2009).
- 1479 49. Floresco, S.B., Todd, C.L. & Grace, A.A. Glutamatergic afferents from the hippocampus  
1480 to the nucleus accumbens regulate activity of ventral tegmental area dopamine neurons. *J*  
1481 *Neurosci* **21**, 4915-22 (2001).
- 1482 50. Kim, M.S. *et al.* Prefrontal Cortex and Amygdala Subregion Morphology Are Associated  
1483 With Obesity and Dietary Self-control in Children and Adolescents. *Front Hum Neurosci* **14**,  
1484 563415 (2020).
- 1485 51. Pizzagalli, D.A. *et al.* Reduced caudate and nucleus accumbens response to rewards in  
1486 unmedicated individuals with major depressive disorder. *Am J Psychiatry* **166**, 702-10 (2009).
- 1487 52. Yoncheva, Y.N. *et al.* Mode of Anisotropy Reveals Global Diffusion Alterations in  
1488 Attention-Deficit/Hyperactivity Disorder. *J Am Acad Child Adolesc Psychiatry* **55**, 137-45 (2016).
- 1489 53. Travis, K.E., Leitner, Y., Feldman, H.M. & Ben-Shachar, M. Cerebellar white matter  
1490 pathways are associated with reading skills in children and adolescents. *Hum Brain Mapp* **36**,  
1491 1536-53 (2015).
- 1492 54. Olivo, G., Latini, F., Wiemerslage, L., Larsson, E.M. & Schioth, H.B. Disruption of  
1493 Accumbens and Thalamic White Matter Connectivity Revealed by Diffusion Tensor  
1494 Tractography in Young Men with Genetic Risk for Obesity. *Front Hum Neurosci* **12**, 75 (2018).
- 1495 55. Wible, C.G. *et al.* Prefrontal cortex, negative symptoms, and schizophrenia: an MRI  
1496 study. *Psychiatry Res* **108**, 65-78 (2001).
- 1497 56. Selemon, L.D. & Zecevic, N. Schizophrenia: a tale of two critical periods for prefrontal  
1498 cortical development. *Transl Psychiatry* **5**, e623 (2015).
- 1499 57. Bryois, J. *et al.* Genetic identification of cell types underlying brain complex traits yields  
1500 insights into the etiology of Parkinson's disease. *Nat Genet* **52**, 482-493 (2020).
- 1501 58. Trubetsky, V. *et al.* Mapping genomic loci implicates genes and synaptic biology in  
1502 schizophrenia. *Nature* **604**, 502-508 (2022).

- 1503 59. Andreasen, N.C. & Pierson, R. The role of the cerebellum in schizophrenia. *Biol*  
1504 *Psychiatry* **64**, 81-8 (2008).
- 1505 60. Middleton, F.A. & Strick, P.L. Anatomical evidence for cerebellar and basal ganglia  
1506 involvement in higher cognitive function. *Science* **266**, 458-61 (1994).
- 1507 61. Heckers, S. Neuropathology of schizophrenia: cortex, thalamus, basal ganglia, and  
1508 neurotransmitter-specific projection systems. *Schizophr Bull* **23**, 403-21 (1997).
- 1509 62. Baldacara, L. *et al.* Is cerebellar volume related to bipolar disorder? *J Affect Disord* **135**,  
1510 305-9 (2011).
- 1511 63. Schutter, D.J., Koolschijn, P.C., Peper, J.S. & Crone, E.A. The cerebellum link to  
1512 neuroticism: a volumetric MRI association study in healthy volunteers. *PLoS One* **7**, e37252  
1513 (2012).
- 1514 64. Beyer, J.L. *et al.* Caudate volume measurement in older adults with bipolar disorder. *Int*  
1515 *J Geriatr Psychiatry* **19**, 109-14 (2004).
- 1516 65. Nixon, P.D. & Passingham, R.E. Predicting sensory events. The role of the cerebellum in  
1517 motor learning. *Exp Brain Res* **138**, 251-7 (2001).
- 1518 66. Cechetto, D.F. & Saper, C.B. Neurochemical organization of the hypothalamic projection  
1519 to the spinal cord in the rat. *J Comp Neurol* **272**, 579-604 (1988).
- 1520 67. Saper, C.B. Hypothalamic connections with the cerebral cortex. *Prog Brain Res* **126**, 39-  
1521 48 (2000).
- 1522 68. Goriounova, N.A. & Mansvelder, H.D. Nicotine exposure during adolescence alters the  
1523 rules for prefrontal cortical synaptic plasticity during adulthood. *Front Synaptic Neurosci* **4**, 3  
1524 (2012).
- 1525 69. Basinger, H. & Hogg, J.P. Neuroanatomy, Brainstem. in *StatPearls* (Treasure Island (FL),  
1526 2022).
- 1527 70. Cotsapas, C. *et al.* Pervasive sharing of genetic effects in autoimmune disease. *PLoS*  
1528 *Genet* **7**, e1002254 (2011).
- 1529 71. Shi, H., Mancuso, N., Spendlove, S. & Pasaniuc, B. Local Genetic Correlation Gives  
1530 Insights into the Shared Genetic Architecture of Complex Traits. *Am J Hum Genet* **101**, 737-751  
1531 (2017).
- 1532 72. Zhang, Y. *et al.* SUPERGENOVA: local genetic correlation analysis reveals heterogeneous  
1533 etiologic sharing of complex traits. *Genome Biol* **22**, 262 (2021).
- 1534 73. Werme, J., van der Sluis, S., Posthuma, D. & de Leeuw, C.A. An integrated framework for  
1535 local genetic correlation analysis. *Nat Genet* **54**, 274-282 (2022).
- 1536 74. Schafer, W.R. & Kenyon, C.J. A calcium-channel homologue required for adaptation to  
1537 dopamine and serotonin in *Caenorhabditis elegans*. *Nature* **375**, 73-8 (1995).
- 1538 75. Weinshenker, D., Garriga, G. & Thomas, J.H. Genetic and pharmacological analysis of  
1539 neurotransmitters controlling egg laying in *C. elegans*. *J Neurosci* **15**, 6975-85 (1995).
- 1540 76. Triarhou, L.C. Introduction. Dopamine and Parkinson's disease. *Adv Exp Med Biol* **517**, 1-  
1541 14 (2002).
- 1542 77. Zielonka, M. *et al.* Dopamine-Responsive Growth-Hormone Deficiency and Central  
1543 Hypothyroidism in Sepiapterin Reductase Deficiency. *JIMD Rep* **24**, 109-13 (2015).
- 1544 78. Comings, D.E. *et al.* The dopamine D2 receptor (DRD2) as a major gene in obesity and  
1545 height. *Biochem Med Metab Biol* **50**, 176-85 (1993).

- 1546 79. Ameri, P. *et al.* Interactions between vitamin D and IGF-I: from physiology to clinical  
1547 practice. *Clin Endocrinol (Oxf)* **79**, 457-63 (2013).
- 1548 80. Wacker, M. & Holick, M.F. Vitamin D - effects on skeletal and extraskeletal health and  
1549 the need for supplementation. *Nutrients* **5**, 111-48 (2013).
- 1550 81. Delecroix, C., Brauner, R. & Souberbielle, J.C. Vitamin D in children with growth  
1551 hormone deficiency due to pituitary stalk interruption syndrome. *BMC Pediatr* **18**, 11 (2018).
- 1552 82. Nechita, F., Alexandru, D.O., Turcu-Stiolica, R. & Nechita, D. The Influence of Personality  
1553 Factors and Stress on Academic Performance. *Curr Health Sci J* **41**, 47-61 (2015).
- 1554 83. Groves, N.J., McGrath, J.J. & Burne, T.H. Vitamin D as a neurosteroid affecting the  
1555 developing and adult brain. *Annu Rev Nutr* **34**, 117-41 (2014).
- 1556 84. Di Somma, C. *et al.* Vitamin D and Neurological Diseases: An Endocrine View. *Int J Mol*  
1557 *Sci* **18**(2017).
- 1558 85. Margolis, K.L. *et al.* Prospective study of leukocyte count as a predictor of incident  
1559 breast, colorectal, endometrial, and lung cancer and mortality in postmenopausal women. *Arch*  
1560 *Intern Med* **167**, 1837-44 (2007).
- 1561 86. Akinbami, A. *et al.* Full blood count pattern of pre-chemotherapy breast cancer patients  
1562 in Lagos, Nigeria. *Caspian J Intern Med* **4**, 574-9 (2013).
- 1563 87. Park, B., Lee, H.S., Lee, J.W. & Park, S. Association of white blood cell count with breast  
1564 cancer burden varies according to menopausal status, body mass index, and hormone receptor  
1565 status: a case-control study. *Sci Rep* **9**, 5762 (2019).
- 1566 88. Wu, A.H., Yu, M.C., Thomas, D.C., Pike, M.C. & Henderson, B.E. Personal and family  
1567 history of lung disease as risk factors for adenocarcinoma of the lung. *Cancer Res* **48**, 7279-84  
1568 (1988).
- 1569 89. Kreuzer, M., Gerken, M., Heinrich, J., Kreienbrock, L. & Wichmann, H.E. Hormonal  
1570 factors and risk of lung cancer among women? *Int J Epidemiol* **32**, 263-71 (2003).
- 1571 90. Kabat, G.C., Miller, A.B. & Rohan, T.E. Reproductive and hormonal factors and risk of  
1572 lung cancer in women: a prospective cohort study. *Int J Cancer* **120**, 2214-20 (2007).
- 1573 91. Baik, C.S., Strauss, G.M., Speizer, F.E. & Feskanich, D. Reproductive factors, hormone  
1574 use, and risk for lung cancer in postmenopausal women, the Nurses' Health Study. *Cancer*  
1575 *Epidemiol Biomarkers Prev* **19**, 2525-33 (2010).
- 1576 92. Wraw, C., Deary, I.J., Gale, C.R. & Der, G. Intelligence in youth and health at age 50.  
1577 *Intelligence* **53**, 23-32 (2015).
- 1578 93. Backhouse, E.V., McHutchison, C.A., Cvorov, V., Shenkin, S.D. & Wardlaw, J.M. Early life  
1579 risk factors for cerebrovascular disease: A systematic review and meta-analysis. *Neurology* **88**,  
1580 976-984 (2017).
- 1581 94. Deary, I.J., Harris, S.E. & Hill, W.D. What genome-wide association studies reveal about  
1582 the association between intelligence and physical health, illness, and mortality. *Curr Opin*  
1583 *Psychol* **27**, 6-12 (2019).
- 1584 95. Shah, S.A., Page, C.P. & Pitchford, S.C. Platelet-Eosinophil Interactions As a Potential  
1585 Therapeutic Target in Allergic Inflammation and Asthma. *Front Med (Lausanne)* **4**, 129 (2017).
- 1586 96. Riazi, H., Ghazanfarpour, M., Taebi, M. & Abdollahian, S. Effect of Vitamin D on the  
1587 Vaginal Health of Menopausal Women: A Systematic Review. *J Menopausal Med* **25**, 109-116  
1588 (2019).



- 1589 97. Maseroli, E. & Vignozzi, L. Testosterone and Vaginal Function. *Sex Med Rev* **8**, 379-392  
1590 (2020).
- 1591 98. de Heredia, F.P., Gomez-Martinez, S. & Marcos, A. Obesity, inflammation and the  
1592 immune system. *Proc Nutr Soc* **71**, 332-8 (2012).
- 1593 99. Tillmann, T. *et al.* Education and coronary heart disease: mendelian randomisation  
1594 study. *BMJ* **358**, j3542 (2017).
- 1595 100. El Khoudary, S.R. *et al.* Menopause Transition and Cardiovascular Disease Risk:  
1596 Implications for Timing of Early Prevention: A Scientific Statement From the American Heart  
1597 Association. *Circulation* **142**, e506-e532 (2020).
- 1598 101. Hak, A.E., Pols, H.A., van Hemert, A.M., Hofman, A. & Witteman, J.C. Progression of  
1599 aortic calcification is associated with metacarpal bone loss during menopause: a population-  
1600 based longitudinal study. *Arterioscler Thromb Vasc Biol* **20**, 1926-31 (2000).
- 1601 102. Gibson, D. & Mehler, P.S. Anorexia Nervosa and the Immune System-A Narrative  
1602 Review. *J Clin Med* **8**(2019).
- 1603 103. Sabharwal, P. *et al.* A Case of Recurrent Insomnia: Extending the Spectrum of  
1604 Autoimmune Encephalitis. *J Clin Sleep Med* **12**, 763-5 (2016).
- 1605 104. Zhang, W., Piotrowska, K., Chavoshan, B., Wallace, J. & Liu, P.Y. Sleep Duration Is  
1606 Associated With Testis Size in Healthy Young Men. *J Clin Sleep Med* **14**, 1757-1764 (2018).
- 1607 105. Wong, H.K., Hoermann, R. & Grossmann, M. Reversible male hypogonadotropic  
1608 hypogonadism due to energy deficit. *Clin Endocrinol (Oxf)* **91**, 3-9 (2019).
- 1609 106. Dahlman, D., Magnusson, H., Li, X., Sundquist, J. & Sundquist, K. Drug use disorder and  
1610 risk of incident and fatal breast cancer: a nationwide epidemiological study. *Breast Cancer Res*  
1611 *Treat* **186**, 199-207 (2021).
- 1612 107. Delezie, J. & Handschin, C. Endocrine Crosstalk Between Skeletal Muscle and the Brain.  
1613 *Front Neurol* **9**, 698 (2018).
- 1614 108. Elsayed, E.F. *et al.* Waist-to-hip ratio and body mass index as risk factors for  
1615 cardiovascular events in CKD. *Am J Kidney Dis* **52**, 49-57 (2008).
- 1616 109. Thalacker-Mercer, A.E., Fleet, J.C., Craig, B.A., Carnell, N.S. & Campbell, W.W.  
1617 Inadequate protein intake affects skeletal muscle transcript profiles in older humans. *Am J Clin*  
1618 *Nutr* **85**, 1344-52 (2007).
- 1619 110. Triebner, K. *et al.* Menopause as a predictor of new-onset asthma: A longitudinal  
1620 Northern European population study. *J Allergy Clin Immunol* **137**, 50-57 e6 (2016).
- 1621 111. van der Plaats, D.A. *et al.* Age at menopause and lung function: a Mendelian  
1622 randomisation study. *Eur Respir J* **54**(2019).
- 1623 112. Peng, H. *et al.* Age at first birth and lung cancer: a two-sample Mendelian randomization  
1624 study. *Transl Lung Cancer Res* **10**, 1720-1733 (2021).
- 1625 113. Lee, J.I. *et al.* Association between visceral adipose tissue and major depressive disorder  
1626 across the lifespan: A scoping review. *Bipolar Disord* **24**, 375-391 (2022).
- 1627 114. Reddy, L.F. *et al.* Impulsivity and risk taking in bipolar disorder and schizophrenia.  
1628 *Neuropsychopharmacology* **39**, 456-63 (2014).
- 1629 115. Hormozdiari, F. *et al.* Leveraging molecular quantitative trait loci to understand the  
1630 genetic architecture of diseases and complex traits. *Nat Genet* **50**, 1041-1047 (2018).
- 1631 116. Gamazon, E.R. *et al.* Using an atlas of gene regulation across 44 human tissues to inform  
1632 complex disease- and trait-associated variation. *Nat Genet* **50**, 956-967 (2018).

1633 117. Yao, D.W., O'Connor, L.J., Price, A.L. & Gusev, A. Quantifying genetic effects on disease  
1634 mediated by assayed gene expression levels. *Nat Genet* **52**, 626-633 (2020).

1635 118. Arvanitis, M., Tayeb, K., Strober, B.J. & Battle, A. Redefining tissue specificity of genetic  
1636 regulation of gene expression in the presence of allelic heterogeneity. *Am J Hum Genet* **109**,  
1637 223-239 (2022).

1638 119. Leyden, G.M. *et al.* Harnessing tissue-specific genetic variation to dissect putative causal  
1639 pathways between body mass index and cardiometabolic phenotypes. *Am J Hum Genet* **109**,  
1640 240-252 (2022).

1641 120. Thom, C.S., Wilken, M.B., Chou, S.T. & Voight, B.F. Body mass index and adipose  
1642 distribution have opposing genetic impacts on human blood traits. *Elife* **11**(2022).

1643 121. Weissbrod, O. *et al.* Functionally informed fine-mapping and polygenic localization of  
1644 complex trait heritability. *Nat Genet* **52**, 1355-1363 (2020).

1645 122. Nathan, A. *et al.* Single-cell eQTL models reveal dynamic T cell state dependence of  
1646 disease loci. *Nature* **606**, 120-128 (2022).

1647 123. Perez, R.K. *et al.* Single-cell RNA-seq reveals cell type-specific molecular and genetic  
1648 associations to lupus. *Science* **376**, eabf1970 (2022).

1649 124. Soskic, B. *et al.* Immune disease risk variants regulate gene expression dynamics during  
1650 CD4(+) T cell activation. *Nat Genet* **54**, 817-826 (2022).

1651
